# Supplementary material for: Association Between Smoking and Molecular Subtypes of Colorectal Cancer
Source: PubMed Central journal article supplement (PMC8346704; doi:10.1093/jncics/pkab056), 2021-06-14
Supplement: pkab056_supplementary_data.pdf [file pkab056_supplementary_data.pdf]

## Supplementary Materials

**Supplementary Table 1. Relationships between individual marker status among colorectal cancer cases<sup>a</sup>**

| Markers              | Within each subset of colorectal cancer cases, No (%) |                    |                                   |                                   |
|----------------------|-------------------------------------------------------|--------------------|-----------------------------------|-----------------------------------|
|                      | MSI-high<br>(N=1,334)                                 | CIMP+<br>(N=1,382) | <i>BRAF</i> -mutated<br>(N=1,008) | <i>KRAS</i> -mutated<br>(N=2,484) |
| MSI-high             | --                                                    | 635 (45.9)         | 536 (53.2)                        | 158 (6.4)                         |
| CIMP+                | 635 (47.6)                                            | --                 | 606 (60.1)                        | 297 (12.0)                        |
| <i>BRAF</i> -mutated | 536 (40.2)                                            | 606 (43.8)         | --                                | 46 (1.9)                          |
| <i>KRAS</i> -mutated | 158 (11.8)                                            | 297 (21.5)         | 46 (4.6)                          | --                                |

<sup>a</sup> MSI: microsatellite instability; CIMP: CpG island methylation phenotype.

**Supplementary Table 2. Sample size and distribution of tumor marker status by colonic location**

| Marker      | Status    | Colonic location, No. (%) |              |              |
|-------------|-----------|---------------------------|--------------|--------------|
|             |           | Proximal colon            | Distal colon | Rectum       |
| <i>BRAF</i> | mut       | 827 (22.5)                | 157 (5.4)    | 91 (3.4)     |
|             | wt        | 2,848 (87.5)              | 2,741 (94.6) | 2,596 (96.6) |
| <i>KRAS</i> | mut       | 1,222 (37.6)              | 769 (31.0)   | 719 (33.0)   |
|             | wt        | 2,030 (62.4)              | 1,714 (69.0) | 1,458 (67.0) |
| CIMP        | +         | 1,200 (35.7)              | 282 (11.2)   | 193 (8.6)    |
|             | -         | 2,165 (64.3)              | 2,245 (88.8) | 2,060 (91.4) |
| MSI         | MSI-H     | 1,135 (29.5)              | 175 (5.6)    | 80 (2.8)     |
|             | MSI-L/MSS | 2,710 (60.5)              | 2,917 (94.4) | 2,737 (97.2) |

\* MSS: microsatellite stable; MSI: microsatellite instability; CIMP: CpG island methylation phenotype; wt: wild type; mut: mutated.

**Supplementary Table 3. Association between smoking status and individual molecular subtypes of colorectal cancer, stratified by colonic location<sup>a</sup>**

| Marker         | Status    | N cases | Smoking       |        |                |              |                      |                     |                 |              |                      |                     |
|----------------|-----------|---------|---------------|--------|----------------|--------------|----------------------|---------------------|-----------------|--------------|----------------------|---------------------|
|                |           |         | Never Smokers |        | Former Smokers |              |                      |                     | Current Smokers |              |                      |                     |
|                |           |         | OR            | 95% CI | OR             | 95% CI       | p-value <sup>b</sup> | p-diff <sup>c</sup> | OR              | 95% CI       | p-value <sup>b</sup> | p-diff <sup>c</sup> |
| Proximal colon |           |         |               |        |                |              |                      |                     |                 |              |                      |                     |
| <i>BRAF</i>    | mut       | 827     | 1.00          | ref    | 1.41           | (1.18, 1.68) | 1.1E-04              |                     | 1.86            | (1.45, 2.38) | 8.5E-07              |                     |
|                | wt        | 2,848   | 1.00          | ref    | 1.03           | (0.94, 1.14) | 0.51                 | 4.2E-03             | 1.21            | (1.04, 1.40) | 0.01                 | 3.7E-04             |
| <i>KRAS</i>    | mut       | 1,222   | 1.00          | ref    | 1.03           | (0.90, 1.19) | 0.64                 |                     | 0.98            | (0.78, 1.22) | 0.85                 |                     |
|                | wt        | 2,030   | 1.00          | ref    | 1.15           | (1.02, 1.28) | 0.02                 | 0.28                | 1.45            | (1.23, 1.80) | 8.3E-06              | 2.2E-03             |
| CIMP           | +         | 1,200   | 1.00          | ref    | 1.30           | (1.11, 1.51) | 7.7E-04              |                     | 1.85            | (1.50, 2.28) | 1.3E-08              |                     |
|                | -         | 2,165   | 1.00          | ref    | 1.05           | (0.94, 1.17) | 0.42                 | 0.04                | 1.09            | (0.92, 1.29) | 0.31                 | 1.0E-06             |
| MSI            | MSI-H     | 1,135   | 1.00          | ref    | 1.24           | (1.06, 1.44) | 6.5E-03              |                     | 1.86            | (1.52, 2.28) | 2.1E-09              |                     |
|                | MSI-L/MSS | 2,710   | 1.00          | ref    | 1.06           | (0.95, 1.17) | 0.29                 | 0.08                | 1.13            | (0.97, 1.32) | 0.11                 | 1.5E-05             |
| Distal colon   |           |         |               |        |                |              |                      |                     |                 |              |                      |                     |
| <i>BRAF</i>    | mut       | 157     | 1.00          | ref    | 1.32           | (0.91, 1.92) | 0.15                 |                     | 1.52            | (0.91, 2.53) | 0.11                 |                     |
|                | wt        | 2,741   | 1.00          | ref    | 1.25           | (1.13, 1.30) | 1.3E-05              | 0.90                | 1.16            | (0.99, 1.35) | 0.06                 | 0.33                |
| <i>KRAS</i>    | mut       | 769     | 1.00          | ref    | 1.43           | (1.20, 1.70) | 5.7E-05              |                     | 1.23            | (0.95, 1.59) | 0.12                 |                     |
|                | wt        | 1,714   | 1.00          | ref    | 1.18           | (1.04, 1.33) | 7.9E-03              | 0.06                | 1.14            | (0.96, 1.37) | 0.14                 | 0.63                |
| CIMP           | +         | 282     | 1.00          | ref    | 1.46           | (1.08, 1.98) | 0.02                 |                     | 1.42            | (0.93, 2.19) | 0.11                 |                     |
|                | -         | 2,245   | 1.00          | ref    | 1.21           | (1.09, 1.35) | 4.3E-04              | 0.37                | 1.13            | (0.96, 1.33) | 0.14                 | 0.19                |
| MSI            | MSI-H     | 175     | 1.00          | ref    | 1.45           | (0.99, 2.13) | 0.06                 |                     | 2.59            | (1.64, 4.08) | 4.2E-05              |                     |
|                | MSI-L/MSS | 2,917   | 1.00          | ref    | 1.25           | (1.13, 1.38) | 1.5E-05              | 0.41                | 1.13            | (0.97, 1.31) | 0.12                 | 6.9E-04             |
| Rectum         |           |         |               |        |                |              |                      |                     |                 |              |                      |                     |
| <i>BRAF</i>    | mut       | 91      | 1.00          | ref    | 1.36           | (0.81, 2.28) | 0.24                 |                     | 2.18            | (1.19, 3.99) | 0.01                 |                     |
|                | wt        | 2,596   | 1.00          | ref    | 1.23           | (1.10, 1.37) | 2.4E-04              | 0.57                | 1.49            | (1.29, 1.74) | 1.4E-07              | 0.07                |
| <i>KRAS</i>    | mut       | 719     | 1.00          | ref    | 1.16           | (0.97, 1.39) | 0.11                 |                     | 1.30            | (1.00, 1.69) | 0.05                 |                     |
|                | wt        | 1,458   | 1.00          | ref    | 1.30           | (1.14, 1.48) | 1.4E-04              | 0.29                | 1.50            | (1.25, 1.80) | 1.5E-05              | 0.26                |
| CIMP           | +         | 193     | 1.00          | ref    | 1.64           | (1.10, 2.43) | 0.01                 |                     | 1.75            | (1.06, 2.90) | 0.03                 |                     |
|                | -         | 2,060   | 1.00          | ref    | 1.21           | (1.07, 1.36) | 1.5E-03              | 0.13                | 1.45            | (1.23, 1.71) | 7.2E-06              | 0.22                |
| MSI            | MSI-H     | 80      | 1.00          | ref    | 0.95           | (0.52, 1.76) | 0.88                 |                     | 2.24            | (1.19, 4.22) | 0.01                 |                     |
|                | MSI-L/MSS | 2,737   | 1.00          | ref    | 1.23           | (1.11, 1.37) | 1.5E-04              | 0.44                | 1.53            | (1.32, 1.77) | 1.1E-08              | 0.17                |

<sup>a</sup> MSS: microsatellite stable; MSI: microsatellite instability; CIMP: CpG island methylation phenotype; wt: wild type; mut: mutated.

<sup>b</sup> Two-side Wald test was used to calculate p-values. A Bonferroni corrected P value threshold of  $6.3 \times 10^{-3}$  was used for case-control analyses.

<sup>c</sup> Two-side Wald test was used to calculate p-values. A Bonferroni corrected P value threshold of  $3.1 \times 10^{-3}$  was used for case-only analyses.

**Supplementary Table 4. Association between smoking pack-years and individual molecular subtypes of colorectal cancer, stratified by colonic location<sup>a</sup>**

| Marker         | Status    | N cases | Smoking (pack-years) |              |            |              |            |              |            |              | p-trend <sup>b</sup> | p-difference <sup>c</sup> |
|----------------|-----------|---------|----------------------|--------------|------------|--------------|------------|--------------|------------|--------------|----------------------|---------------------------|
|                |           |         | Quartile 1           |              | Quartile 2 |              | Quartile 3 |              | Quartile 4 |              |                      |                           |
|                |           |         | OR                   | 95% CI       | OR         | 95% CI       | OR         | 95% CI       | OR         | 95% CI       |                      |                           |
| Proximal colon |           |         |                      |              |            |              |            |              |            |              |                      |                           |
| <i>BRAF</i>    | mut       | 677     | 0.87                 | (0.63, 1.18) | 1.41       | (1.09, 1.83) | 1.67       | (1.30, 2.13) | 1.91       | (1.51, 2.40) | 1.6E-05              |                           |
|                | wt        | 2,467   | 1.01                 | (0.87, 1.17) | 0.98       | (0.85, 1.14) | 1.01       | (0.87, 1.18) | 1.23       | (1.07, 1.41) | 0.10                 | 1.5E-06                   |
| <i>KRAS</i>    | mut       | 1,023   | 1.06                 | (0.86, 1.31) | 0.89       | (0.72, 1.11) | 1.00       | (0.81, 1.23) | 1.04       | (0.85, 1.27) | 0.92                 |                           |
|                | wt        | 1,751   | 0.92                 | (0.76, 1.10) | 1.15       | (0.97, 1.36) | 1.22       | (1.03, 1.44) | 1.49       | (1.28, 1.74) | 9.7E-05              | 5.4E-04                   |
| CIMP           | +         | 925     | 1.12                 | (0.88, 1.42) | 1.27       | (1.01, 1.60) | 1.48       | (1.19, 1.84) | 1.80       | (1.47, 2.20) | 2.9E-05              |                           |
|                | -         | 1,988   | 1.02                 | (0.87, 1.20) | 0.98       | (0.84, 1.16) | 0.99       | (0.84, 1.16) | 1.16       | (1.00, 1.36) | 0.28                 | 2.4E-07                   |
| MSI            | MSI-H     | 946     | 1.06                 | (0.84, 1.35) | 1.19       | (0.95, 1.50) | 1.52       | (1.23, 1.88) | 1.65       | (1.34, 2.02) | 1.1E-04              |                           |
|                | MSI-L/MSS | 2,321   | 1.00                 | (0.86, 1.16) | 1.02       | (0.88, 1.19) | 0.99       | (0.85, 1.16) | 1.18       | (1.03, 1.37) | 0.26                 | 1.2E-04                   |
| Distal colon   |           |         |                      |              |            |              |            |              |            |              |                      |                           |
| <i>BRAF</i>    | mut       | 134     | 0.70                 | (0.34, 1.43) | 1.62       | (0.97, 2.71) | 1.62       | (0.97, 2.70) | 1.75       | (1.05, 2.90) | 6.5E-03              |                           |
|                | wt        | 2,362   | 0.91                 | (0.77, 1.07) | 1.32       | (1.15, 1.53) | 1.25       | (1.08, 1.45) | 1.47       | (1.27, 1.69) | 6.0E-10              | 0.27                      |
| <i>KRAS</i>    | mut       | 663     | 1.07                 | (0.81, 1.41) | 1.36       | (1.05, 1.74) | 1.60       | (1.26, 2.03) | 1.61       | (1.27, 2.05) | 2.2E-06              |                           |
|                | wt        | 1,473   | 0.82                 | (0.67, 1.01) | 1.27       | (1.07, 1.51) | 1.14       | (0.95, 1.36) | 1.38       | (1.16, 1.63) | 2.1E-05              | 0.08                      |
| CIMP           | +         | 192     | 0.79                 | (0.44, 1.41) | 1.31       | (0.81, 2.11) | 1.94       | (1.27, 2.96) | 1.92       | (1.27, 2.96) | 1.4E-04              |                           |
|                | -         | 2,011   | 0.89                 | (0.75, 1.06) | 1.27       | (1.09, 1.49) | 1.22       | (1.05, 1.43) | 1.41       | (1.21, 1.64) | 2.7E-07              | 0.04                      |
| MSI            | MSI-H     | 151     | 1.03                 | (0.56, 1.93) | 1.61       | (0.95, 2.71) | 2.21       | (1.37, 3.57) | 2.23       | (1.37, 3.65) | 1.0E-04              |                           |
|                | MSI-L/MSS | 2,470   | 0.89                 | (0.75, 1.04) | 1.29       | (1.12, 1.49) | 1.26       | (1.09, 1.46) | 1.42       | (1.24, 1.64) | 7.4E-09              | 0.02                      |
| Rectum         |           |         |                      |              |            |              |            |              |            |              |                      |                           |
| <i>BRAF</i>    | mut       | 75      | 0.57                 | (0.20, 1.64) | 1.86       | (0.98, 3.53) | 1.65       | (0.83, 3.29) | 1.97       | (1.00, 3.88) | 8.9E-03              |                           |
|                | wt        | 2,173   | 1.07                 | (0.90, 1.26) | 1.29       | (1.11, 1.51) | 1.19       | (1.01, 1.40) | 1.52       | (1.31, 1.76) | 8.7E-10              | 0.13                      |
| <i>KRAS</i>    | mut       | 578     | 1.07                 | (0.81, 1.42) | 1.28       | (0.99, 1.66) | 1.04       | (0.79, 1.38) | 1.34       | (1.04, 1.73) | 0.04                 |                           |
|                | wt        | 1,194   | 1.01                 | (0.91, 1.25) | 1.35       | (1.11, 1.63) | 1.24       | (1.02, 1.51) | 1.61       | (1.34, 1.94) | 1.7E-09              | 0.17                      |
| CIMP           | +         | 109     | 0.93                 | (0.45, 1.93) | 1.58       | (0.88, 2.87) | 1.72       | (0.96, 3.08) | 1.97       | (1.12, 3.44) | 6.4E-03              |                           |
|                | -         | 1,793   | 1.08                 | (0.90, 1.29) | 1.29       | (1.09, 1.51) | 1.17       | (0.98, 1.38) | 1.60       | (1.36, 1.87) | 7.0E-10              | 0.27                      |
| MSI            | MSI-H     | 70      | 1.30                 | (0.60, 2.84) | 1.02       | (0.45, 2.29) | 0.87       | (0.35, 2.15) | 1.45       | (0.64, 3.31) | 0.48                 |                           |
|                | MSI-L/MSS | 2,252   | 1.10                 | (0.93, 1.29) | 1.34       | (1.15, 1.56) | 1.18       | (1.00, 1.38) | 1.55       | (1.34, 1.80) | 8.6E-11              | 0.70                      |

<sup>a</sup> MSS: microsatellite stable; MSI: microsatellite instability; CIMP: CpG island methylation phenotype; wt: wild type; mut: mutated.

<sup>b</sup> Two-side Wald test was used to calculate p-values. A Bonferroni corrected P value threshold of  $6.3 \times 10^{-3}$  was used for case-control analyses.

<sup>c</sup> Two-side Wald test was used to calculate p-values. A Bonferroni corrected P value threshold of  $3.1 \times 10^{-3}$  was used for case-only analyses.

**Supplementary Table 5. Association between smoking status and individual molecular subtypes of colorectal cancer, stratified by sex <sup>a</sup>**

| Marker        | Status    | N cases | Smoking       |        |                |              |                      |                     |                 |              |                      |                     |
|---------------|-----------|---------|---------------|--------|----------------|--------------|----------------------|---------------------|-----------------|--------------|----------------------|---------------------|
|               |           |         | Never Smokers |        | Former Smokers |              |                      |                     | Current Smokers |              |                      |                     |
|               |           |         | OR            | 95% CI | OR             | 95% CI       | p-value <sup>b</sup> | p-diff <sup>c</sup> | OR              | 95% CI       | p-value <sup>b</sup> | p-diff <sup>c</sup> |
| <b>Male</b>   |           |         |               |        |                |              |                      |                     |                 |              |                      |                     |
| <i>BRAF</i>   | mut       | 409     | 1.00          | ref    | 1.30           | (1.01, 1.67) | 0.04                 |                     | 1.86            | (1.32, 2.62) | 4.3E-04              |                     |
|               | wt        | 4,687   | 1.00          | ref    | 1.26           | (1.15, 1.39) | 7.6E-07              | 0.80                | 1.37            | (1.20, 1.58) | 8.2E-06              | 0.04                |
| <i>KRAS</i>   | mut       | 1,510   | 1.00          | ref    | 1.27           | (1.11, 1.45) | 5.8E-04              |                     | 1.15            | (0.93, 1.43) | 0.19                 |                     |
|               | wt        | 2,821   | 1.00          | ref    | 1.23           | (1.10, 1.37) | 1.6E-04              | 0.74                | 1.46            | (1.25, 1.71) | 2.8E-06              | 0.03                |
| CIMP          | +         | 755     | 1.00          | ref    | 1.33           | (1.09, 1.62) | 4.7E-03              |                     | 1.66            | (1.25, 2.22) | 5.6E-04              |                     |
|               | -         | 3,678   | 1.00          | ref    | 1.27           | (1.15, 1.40) | 3.3E-06              | 0.69                | 1.38            | (1.18, 1.60) | 3.1E-05              | 0.03                |
| MSI           | MSI-H     | 634     | 1.00          | ref    | 1.49           | (1.20, 1.84) | 3.3E-04              |                     | 2.20            | (1.67, 2.91) | 2.3E-08              |                     |
|               | MSI-L/MSS | 4,750   | 1.00          | ref    | 1.26           | (1.14, 1.38) | 1.4E-06              | 0.12                | 1.36            | (1.18, 1.56) | 1.6E-05              | 4.8E-04             |
| <b>Female</b> |           |         |               |        |                |              |                      |                     |                 |              |                      |                     |
| <i>BRAF</i>   | mut       | 730     | 1.00          | ref    | 1.53           | (1.27, 1.85) | 1.2E-05              |                     | 1.90            | (1.46, 2.47) | 1.4E-06              |                     |
|               | wt        | 3,872   | 1.00          | ref    | 1.06           | (0.96, 1.18) | 0.25                 | 8.1E-04             | 1.20            | (1.03, 1.38) | 0.02                 | 9.6E-04             |
| <i>KRAS</i>   | mut       | 1,327   | 1.00          | ref    | 1.02           | (0.88, 1.19) | 0.78                 |                     | 1.07            | (0.87, 1.32) | 0.53                 |                     |
|               | wt        | 2,605   | 1.00          | ref    | 1.21           | (1.08, 1.36) | 1.3E-03              | 0.04                | 1.34            | (1.14, 1.57) | 3.5E-04              | 0.04                |
| CIMP          | +         | 1,013   | 1.00          | ref    | 1.39           | (1.17, 1.67) | 2.2E-04              |                     | 1.91            | (1.52, 2.41) | 4.5E-08              |                     |
|               | -         | 3,052   | 1.00          | ref    | 1.07           | (0.95, 1.19) | 0.26                 | 0.01                | 1.08            | (0.92, 1.27) | 0.33                 | 5.5E-06             |
| MSI           | MSI-H     | 862     | 1.00          | ref    | 1.25           | (1.04, 1.50) | 0.02                 |                     | 1.97            | (1.56, 2.49) | 1.6E-08              |                     |
|               | MSI-L/MSS | 4,001   | 1.00          | ref    | 1.09           | (0.99, 1.21) | 0.09                 | 0.21                | 1.18            | (1.02, 1.37) | 0.02                 | 3.9E-05             |

<sup>a</sup> MSS: microsatellite stable; MSI: microsatellite instability; CIMP: CpG island methylation phenotype; wt: wild type; mut: mutated;

<sup>b</sup> Two-side Wald test was used to calculate p-values. A Bonferroni corrected P value threshold of  $6.3 \times 10^{-3}$  was used for case-control analyses.

<sup>c</sup> Two-side Wald test was used to calculate p-values. A Bonferroni corrected P value threshold of  $3.1 \times 10^{-3}$  was used for case-only analyses.

**Supplementary Table 6. Association between smoking pack-years and individual molecular subtypes of colorectal cancer, stratified by sex<sup>a</sup>**

| Marker        | Status    | N cases | Smoking (pack-years) |              |            |              |            |              |            |              | p-trend <sup>b</sup> | p-difference <sup>c</sup> |
|---------------|-----------|---------|----------------------|--------------|------------|--------------|------------|--------------|------------|--------------|----------------------|---------------------------|
|               |           |         | Quartile 1           |              | Quartile 2 |              | Quartile 3 |              | Quartile 4 |              |                      |                           |
|               |           |         | OR                   | 95% CI       | OR         | 95% CI       | OR         | 95% CI       | OR         | 95% CI       |                      |                           |
| <b>Male</b>   |           |         |                      |              |            |              |            |              |            |              |                      |                           |
| <i>BRAF</i>   | mut       | 326     | 0.88                 | (0.58, 1.34) | 1.47       | (1.04, 2.09) | 1.59       | (1.13, 2.24) | 1.71       | (1.23, 2.38) | 8.4E-05              |                           |
|               | wt        | 3,895   | 1.07                 | (0.93, 1.23) | 1.27       | (1.12, 1.45) | 1.29       | (1.13, 1.48) | 1.49       | (1.31, 1.48) | 3.5E-11              | 0.15                      |
| <i>KRAS</i>   | mut       | 1,218   | 1.18                 | (0.96, 1.44) | 1.20       | (0.99, 1.44) | 1.31       | (1.08, 1.59) | 1.32       | (1.09, 1.60) | 7.7E-04              |                           |
|               | wt        | 2,346   | 0.95                 | (0.81, 1.13) | 1.31       | (1.12, 1.52) | 1.28       | (1.10, 1.49) | 1.52       | (1.32, 1.76) | 4.4E-10              | 0.13                      |
| CIMP          | +         | 503     | 0.99                 | (0.72, 1.36) | 1.27       | (0.95, 1.71) | 1.61       | (1.22, 2.12) | 1.69       | (1.29, 2.21) | 3.9E-06              |                           |
|               | -         | 3,216   | 1.09                 | (0.94, 1.26) | 1.33       | (1.16, 1.53) | 1.30       | (1.13, 1.50) | 1.49       | (1.30, 1.71) | 2.6E-10              | 0.10                      |
| MSI           | MSI-H     | 515     | 1.39                 | (1.02, 1.90) | 1.41       | (1.04, 1.91) | 1.94       | (1.47, 2.58) | 2.01       | (1.51, 2.67) | 2.9E-08              |                           |
|               | MSI-L/MSS | 3,854   | 1.06                 | (0.92, 1.22) | 1.29       | (1.13, 1.47) | 1.26       | (1.13, 1.47) | 1.45       | (1.28, 1.65) | 5.0E-10              | 6.1E-03                   |
| <b>Female</b> |           |         |                      |              |            |              |            |              |            |              |                      |                           |
| <i>BRAF</i>   | mut       | 595     | 0.80                 | (0.56, 1.15) | 1.61       | (1.22, 2.14) | 1.75       | (1.33, 2.31) | 2.11       | (1.63, 2.72) | 3.4E-11              |                           |
|               | wt        | 3,338   | 0.91                 | (0.77, 1.08) | 1.15       | (0.98, 1.34) | 1.01       | (0.86, 1.19) | 1.23       | (1.05, 1.43) | 0.02                 | 1.9E-07                   |
| <i>KRAS</i>   | mut       | 1,113   | 0.89                 | (0.70, 1.13) | 1.03       | (0.82, 1.29) | 0.98       | (0.78, 1.24) | 1.14       | (0.92, 1.42) | 0.36                 |                           |
|               | wt        | 2,201   | 0.91                 | (0.75, 1.10) | 1.27       | (1.06, 1.51) | 1.18       | (0.98, 1.41) | 1.45       | (1.22, 1.71) | 3.6E-06              | 0.01                      |
| CIMP          | +         | 744     | 1.10                 | (0.81, 1.47) | 1.36       | (1.03, 1.78) | 1.56       | (1.20, 2.02) | 2.04       | (1.61, 2.58) | 3.8E-10              |                           |
|               | -         | 2,750   | 0.91                 | (0.76, 1.09) | 1.08       | (0.91, 1.28) | 0.99       | (0.83, 1.18) | 1.22       | (1.04, 1.44) | 0.05                 | 2.9E-06                   |
| MSI           | MSI-H     | 724     | 0.99                 | (0.73, 1.35) | 1.31       | (1.00, 1.73) | 1.46       | (1.12, 1.90) | 1.70       | (1.33, 2.18) | 2.1E-06              |                           |
|               | MSI-L/MSS | 3,401   | 0.90                 | (0.76, 1.06) | 1.18       | (1.01, 1.39) | 1.03       | (0.88, 1.22) | 1.27       | (1.08, 1.48) | 3.6E-03              | 3.1E-03                   |

<sup>a</sup> MSS: microsatellite stable; MSI: microsatellite instability; CIMP: CpG island methylation phenotype; wt: wild type; mut: mutated;

<sup>b</sup> Two-side Wald test was used to calculate p-values. A Bonferroni corrected P value threshold of  $6.3 \times 10^{-3}$  was used for case-control analyses.

<sup>c</sup> Two-side Wald test was used to calculate p-values. A Bonferroni corrected P value threshold of  $3.1 \times 10^{-3}$  was used for case-only analyses.



**Supplementary Table 7. Association between smoking status and individual molecular subtypes of colorectal cancer, stratified by study design<sup>a</sup>**

| Marker              | Status    | N cases | Smoking       |        |                |              |                      |                     |                 |              |                      |                     |
|---------------------|-----------|---------|---------------|--------|----------------|--------------|----------------------|---------------------|-----------------|--------------|----------------------|---------------------|
|                     |           |         | Never Smokers |        | Former Smokers |              |                      |                     | Current Smokers |              |                      |                     |
|                     |           |         | OR            | 95% CI | OR             | 95% CI       | p-value <sup>b</sup> | p-diff <sup>c</sup> | OR              | 95% CI       | p-value <sup>b</sup> | p-diff <sup>c</sup> |
| <b>Cohort</b>       |           |         |               |        |                |              |                      |                     |                 |              |                      |                     |
| <i>BRAF</i>         | mut       | 373     | 1.00          | ref    | 1.23           | (0.97, 1.56) | 0.08                 |                     | 1.76            | (1.21, 2.56) | 2.9E-03              |                     |
|                     | wt        | 2,099   | 1.00          | ref    | 1.19           | (1.06, 1.35) | 4.97E-03             | 0.76                | 1.43            | (1.15, 1.77) | 1.1E-03              | 0.30                |
| <i>KRAS</i>         | mut       | 824     | 1.00          | ref    | 1.21           | (1.02, 1.43) | 0.03                 |                     | 1.22            | (0.90, 1.64) | 0.20                 |                     |
|                     | wt        | 1,526   | 1.00          | ref    | 1.17           | (1.02, 1.34) | 0.03                 | 0.80                | 1.52            | (1.21, 1.91) | 3.7E-04              | 0.12                |
| CIMP                | +         | 427     | 1.00          | ref    | 1.29           | (1.03, 1.62) | 0.03                 |                     | 2.36            | (1.67, 3.34) | 1.4E-06              |                     |
|                     | -         | 2,094   | 1.00          | ref    | 1.17           | (1.04, 1.33) | 0.01                 | 0.42                | 1.31            | (1.06, 1.68) | 0.02                 | 1.3E-03             |
| MSI                 | MSI-H     | 400     | 1.00          | ref    | 1.33           | (1.06, 1.68) | 0.02                 |                     | 2.19            | (1.54, 3.14) | 1.6E-05              |                     |
|                     | MSI-L/MSS | 2,066   | 1.00          | ref    | 1.17           | (1.03, 1.32) | 0.02                 | 0.26                | 1.38            | (1.11, 1.71) | 3.7E-03              | 0.14                |
| <b>Case-control</b> |           |         |               |        |                |              |                      |                     |                 |              |                      |                     |
| <i>BRAF</i>         | mut       | 635     | 1.00          | ref    | 1.59           | (1.30, 1.93) | 4.1E-06              |                     | 2.05            | (1.59, 2.64) | 2.4E-08              |                     |
|                     | wt        | 5,596   | 1.00          | ref    | 1.16           | (1.07, 1.26) | 4.8E-04              | 4.4E-03             | 1.25            | (1.11, 1.40) | 1.6E-04              | 2.7E-05             |
| <i>KRAS</i>         | mut       | 1,660   | 1.00          | ref    | 1.13           | (1.00, 1.28) | 0.05                 |                     | 1.08            | (0.91, 1.29) | 0.38                 |                     |
|                     | wt        | 3,366   | 1.00          | ref    | 1.23           | (1.12, 1.36) | 1.6E-05              | 0.21                | 1.38            | (1.21, 1.57) | 1.0E-06              | 9.0E-03             |
| CIMP                | +         | 955     | 1.00          | ref    | 1.42           | (1.21, 1.66) | 2.0E-05              |                     | 1.68            | (1.36, 2.07) | 1.6E-06              |                     |
|                     | -         | 4,138   | 1.00          | ref    | 1.16           | (1.06, 1.27) | 1.4E-03              | 0.03                | 1.21            | (1.07, 1.38) | 2.9E-03              | 2.6E-04             |
| MSI                 | MSI-H     | 934     | 1.00          | ref    | 1.24           | (1.05, 1.47) | 0.01                 |                     | 1.96            | (1.59, 2.40) | 1.3E-10              |                     |
|                     | MSI-L/MSS | 5,762   | 1.00          | ref    | 1.18           | (1.09, 1.28) | 5.1E-05              | 0.58                | 1.25            | (1.11, 1.40) | 1.2E-04              | 9.5E-06             |

<sup>a</sup> MSS: microsatellite stable; MSI: microsatellite instability; CIMP: CpG island methylation phenotype; wt: wild type; mut: mutated;

<sup>b</sup> Two-side Wald test was used to calculate p-values. A Bonferroni corrected P value threshold of  $6.3 \times 10^{-3}$  was used for case-control analyses.

<sup>c</sup> Two-side Wald test was used to calculate p-values. A Bonferroni corrected P value threshold of  $3.1 \times 10^{-3}$  was used for case-only analyses.

**Supplementary Table 8. Association between smoking pack-years and individual molecular subtypes of colorectal cancer, stratified by study design<sup>a</sup>**

| Marker              | Status    | N cases | Smoking (pack-years) |              |            |              |            |              |            |              | p-trend <sup>b</sup> | p-difference <sup>c</sup> |
|---------------------|-----------|---------|----------------------|--------------|------------|--------------|------------|--------------|------------|--------------|----------------------|---------------------------|
|                     |           |         | Quartile 1           |              | Quartile 2 |              | Quartile 3 |              | Quartile 4 |              |                      |                           |
|                     |           |         | OR                   | 95% CI       | OR         | 95% CI       | OR         | 95% CI       | OR         | 95% CI       |                      |                           |
| <b>Cohort</b>       |           |         |                      |              |            |              |            |              |            |              |                      |                           |
| <i>BRAF</i>         | mut       | 366     | 0.78                 | (0.51, 1.19) | 1.34       | (0.95, 1.89) | 1.14       | (0.80, 1.62) | 2.04       | (1.52, 2.74) | 1.3E-05              |                           |
|                     | wt        | 2,022   | 1.05                 | (0.86, 1.27) | 1.20       | (1.00, 1.44) | 1.15       | (0.96, 1.38) | 1.46       | (1.23, 1.74) | 3.0E-05              | 0.04                      |
| <i>KRAS</i>         | mut       | 792     | 1.11                 | (0.86, 1.44) | 1.11       | (0.86, 1.43) | 1.09       | (0.84, 1.40) | 1.49       | (1.18, 1.88) | 3.7E-03              |                           |
|                     | wt        | 1,475   | 0.92                 | (0.74, 1.14) | 1.26       | (1.03, 1.53) | 1.18       | (0.96, 1.44) | 1.48       | (1.23, 1.79) | 2.1E-05              | 0.51                      |
| CIMP                | +         | 413     | 1.07                 | (0.74, 1.54) | 1.13       | (0.80, 1.60) | 1.27       | (0.91, 1.77) | 2.18       | (1.64, 2.89) | 8.8E-07              |                           |
|                     | -         | 2,026   | 1.01                 | (0.84, 1.22) | 1.19       | (1.00, 1.43) | 1.14       | (0.95, 1.37) | 1.39       | (1.17, 1.65) | 1.8E-04              | 5.6E-03                   |
| MSI                 | MSI-H     | 395     | 1.15                 | (0.80, 1.66) | 1.29       | (0.91, 1.82) | 1.36       | (0.97, 1.90) | 2.16       | (1.62, 2.89) | 1.1E-06              |                           |
|                     | MSI-L/MSS | 1,989   | 1.00                 | (0.83, 1.22) | 1.18       | (0.98, 1.42) | 1.12       | (0.93, 1.35) | 1.43       | (1.20, 1.70) | 1.1E-04              | 8.1E-03                   |
| <b>Case-control</b> |           |         |                      |              |            |              |            |              |            |              |                      |                           |
| <i>BRAF</i>         | mut       | 555     | 0.90                 | (0.63, 1.29) | 1.74       | (1.31, 2.31) | 2.23       | (1.70, 2.91) | 1.82       | (1.38, 2.39) | 2.7E-10              |                           |
|                     | wt        | 5,211   | 0.96                 | (0.85, 1.09) | 1.21       | (1.07, 1.36) | 1.17       | (1.04, 1.33) | 1.33       | (1.18, 1.50) | 1.5E-07              | 2.0E-05                   |
| <i>KRAS</i>         | mut       | 1,539   | 1.01                 | (0.84, 1.22) | 1.12       | (0.94, 1.34) | 1.20       | (1.01, 1.44) | 1.10       | (0.92, 1.32) | 0.06                 |                           |
|                     | wt        | 3,072   | 0.93                 | (0.80, 1.09) | 1.29       | (1.12, 1.48) | 1.26       | (1.09, 1.45) | 1.48       | (1.29, 1.69) | 1.4E-10              | 6.6E-03                   |
| CIMP                | +         | 834     | 1.05                 | (0.80, 1.38) | 1.44       | (1.13, 1.84) | 1.83       | (1.46, 2.31) | 1.72       | (1.37, 2.15) | 6.8E-10              |                           |
|                     | -         | 3,940   | 0.99                 | (0.86, 1.14) | 1.21       | (1.06, 1.38) | 1.16       | (1.02, 1.33) | 1.34       | (1.18, 1.52) | 1.5E-06              | 4.4E-04                   |
| MSI                 | MSI-H     | 844     | 1.09                 | (0.84, 1.42) | 1.29       | (1.01, 1.64) | 1.72       | (1.37, 2.16) | 1.47       | (1.15, 1.86) | 2.7E-06              |                           |
|                     | MSI-L/MSS | 5,266   | 0.97                 | (0.86, 1.11) | 1.26       | (1.12, 1.42) | 1.18       | (1.04, 1.33) | 1.34       | (1.19, 1.51) | 3.8E-08              | 0.04                      |

<sup>a</sup> MSS: microsatellite stable; MSI: microsatellite instability; CIMP: CpG island methylation phenotype; wt: wild type; mut: mutated;

<sup>b</sup> Two-side Wald test was used to calculate p-values. A Bonferroni corrected P value threshold of  $6.3 \times 10^{-3}$  was used for case-control analyses.

<sup>c</sup> Two-side Wald test was used to calculate p-values. A Bonferroni corrected P value threshold of  $3.1 \times 10^{-3}$  was used for case-only analyses.

Supplementary Figure 1. Sample size of smoking status by CRC subtypes defined by combined marker status

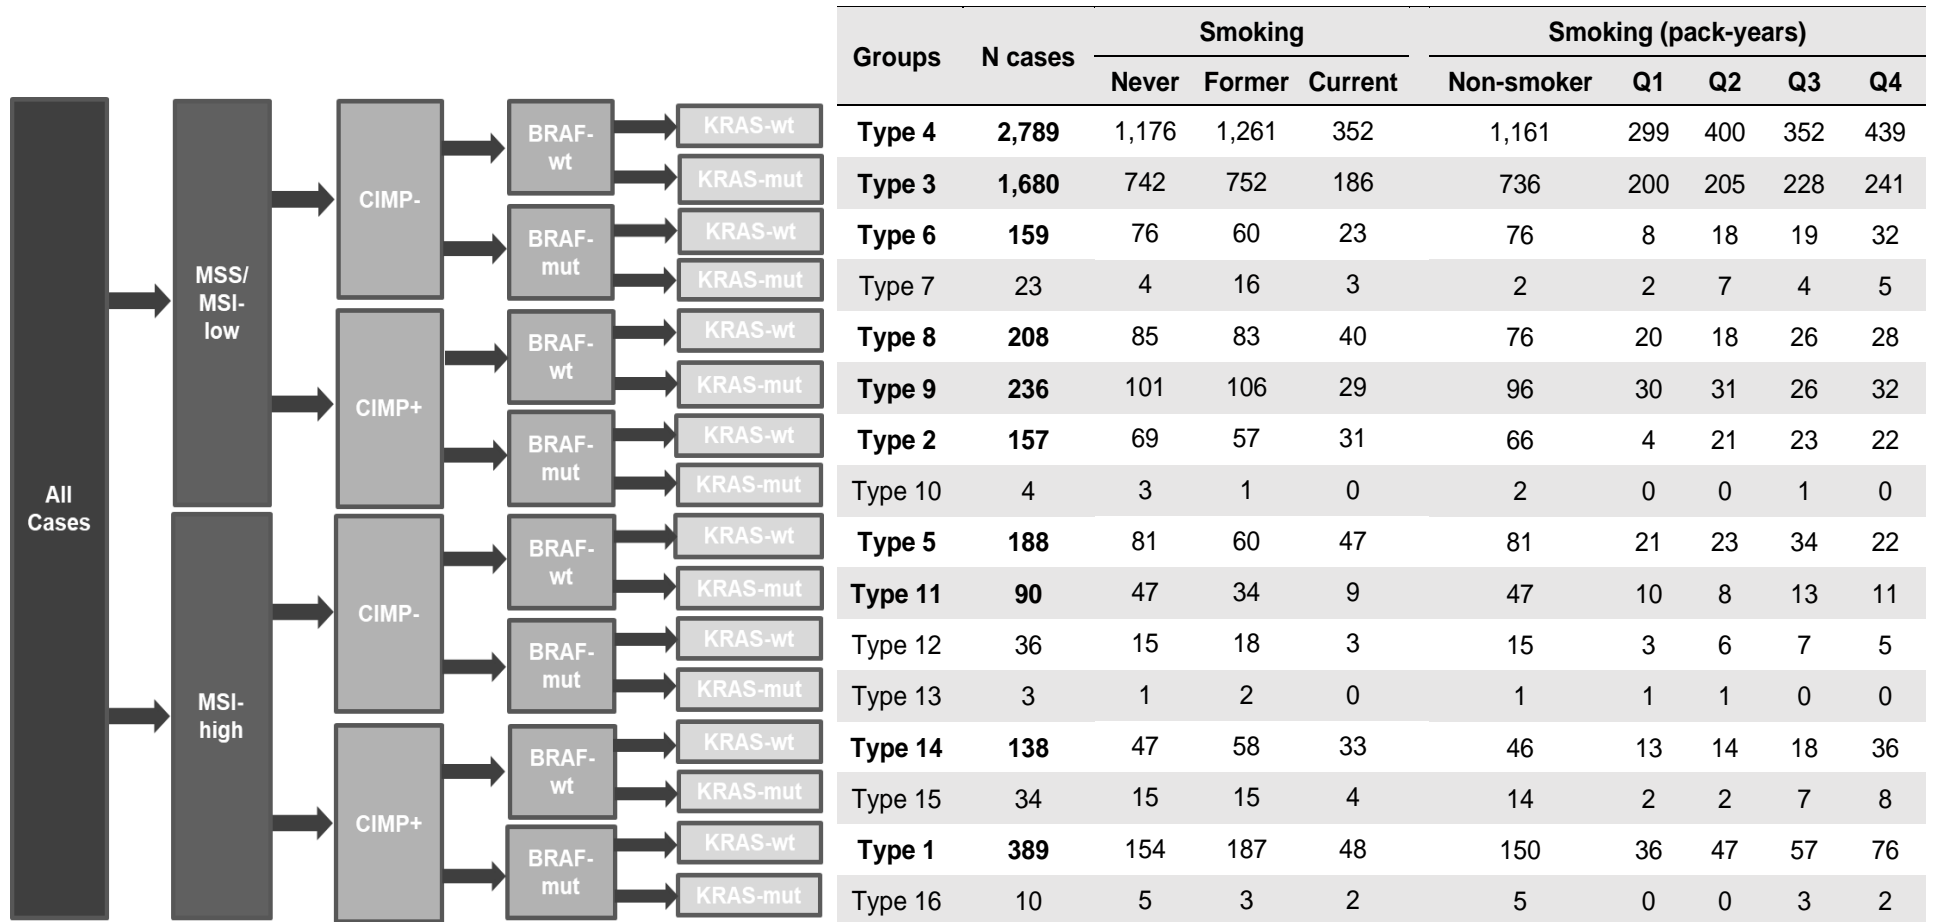

MSS: microsatellite stable; MSI: microsatellite instability; CIMP: CpG island methylation phenotype; wt: wild type; mut: mutated; Bold types are the CRC subtypes with at least 50 cases and were included in the combined marker analysis.

Supplementary Figure 2. Association between former and current smokers and risk of CRC subtypes defined by combined marker status, stratified by colonic location

A) Proximal colon: Former smokers vs. never smokers

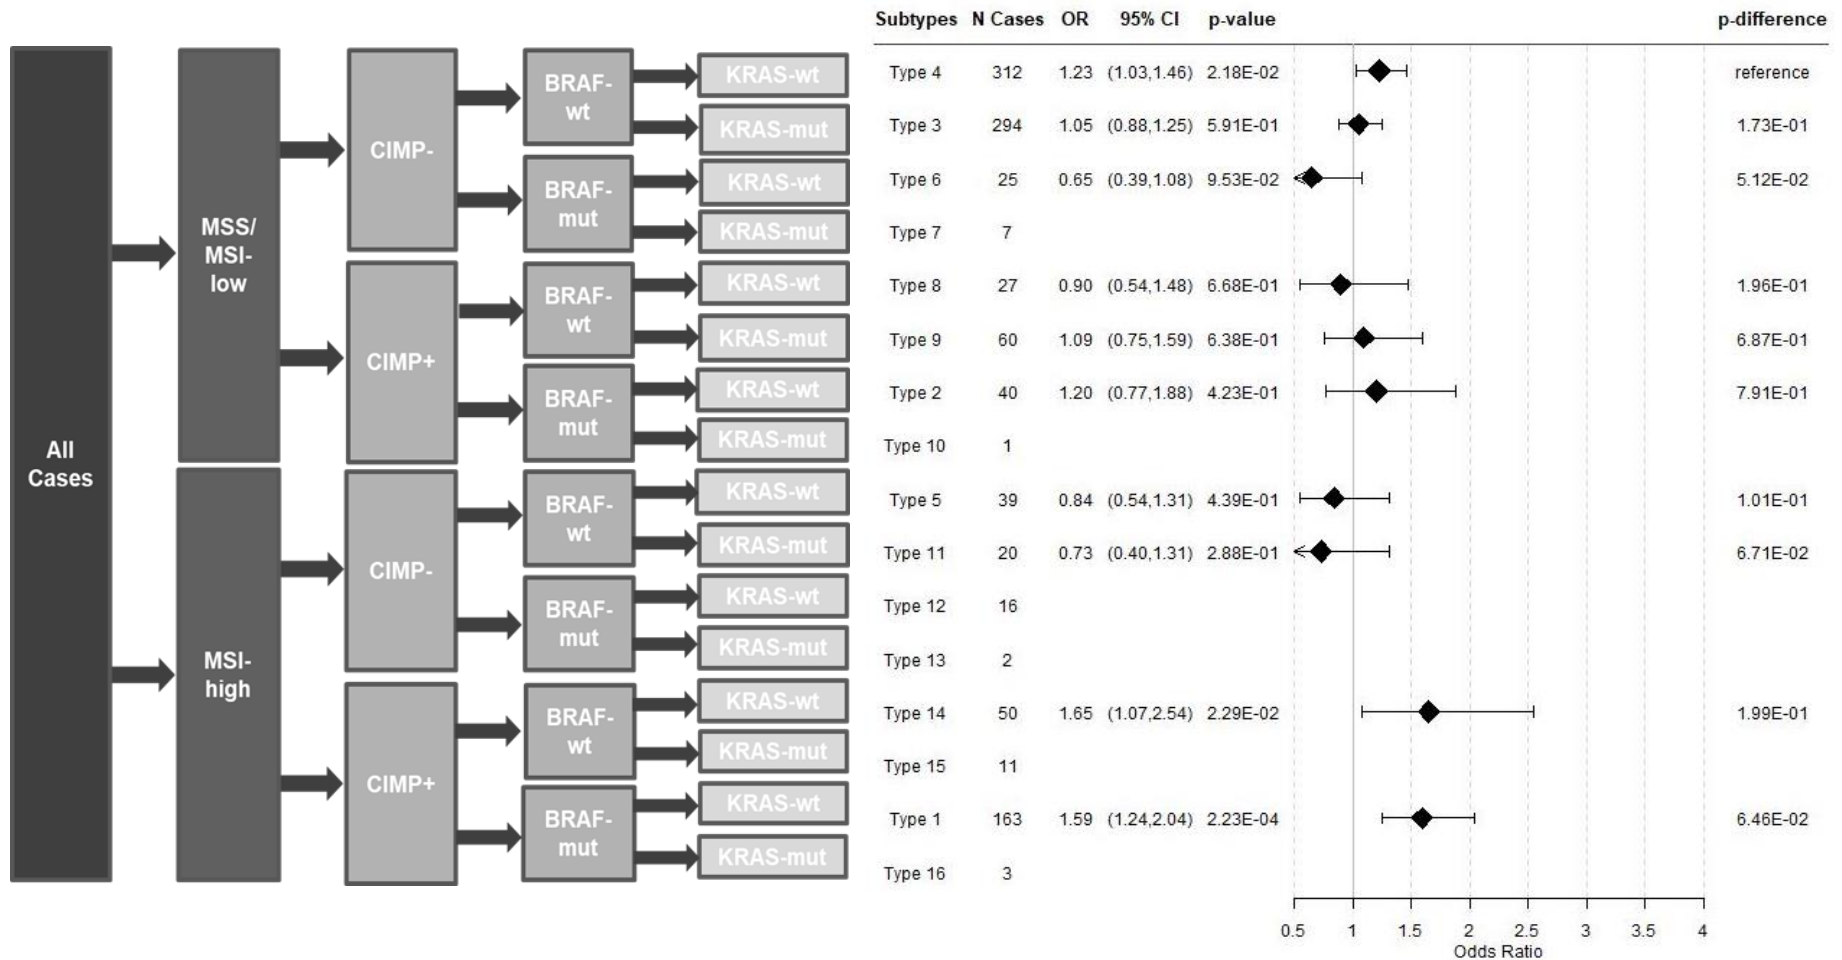

## B) Proximal colon: Current smokers vs. never smokers

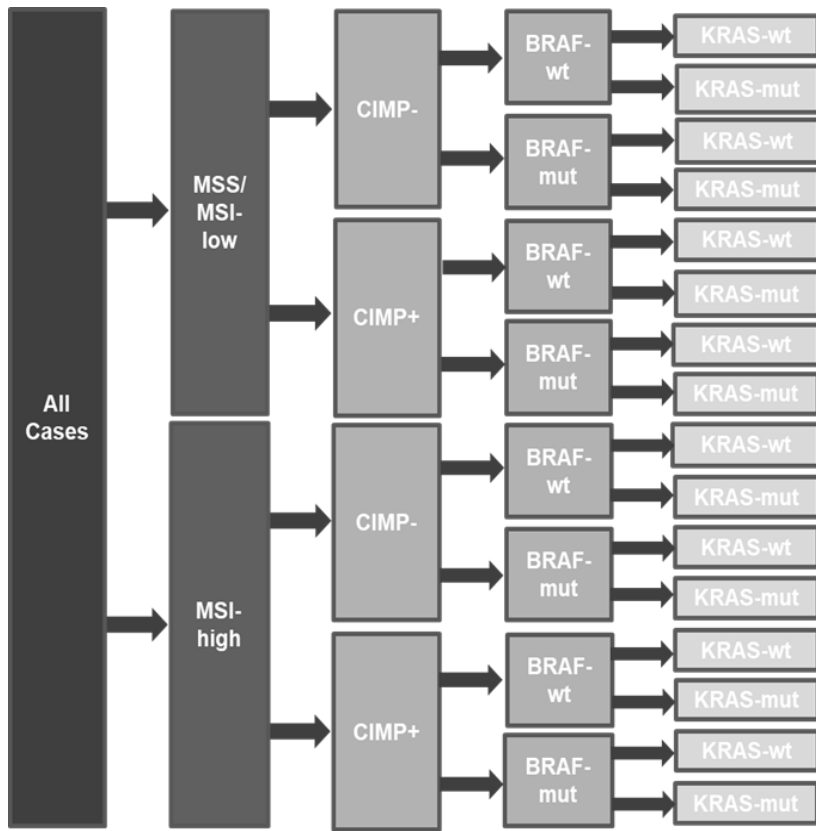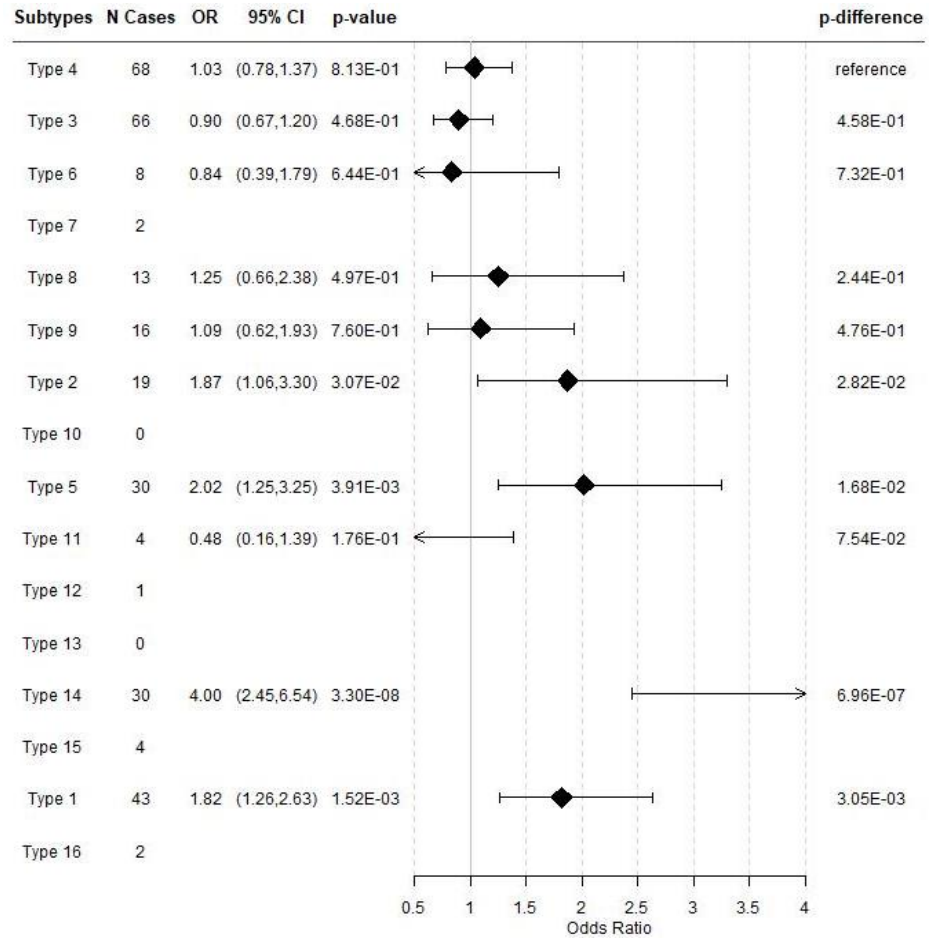

### C) Distal colon: Former smokers vs. never smokers

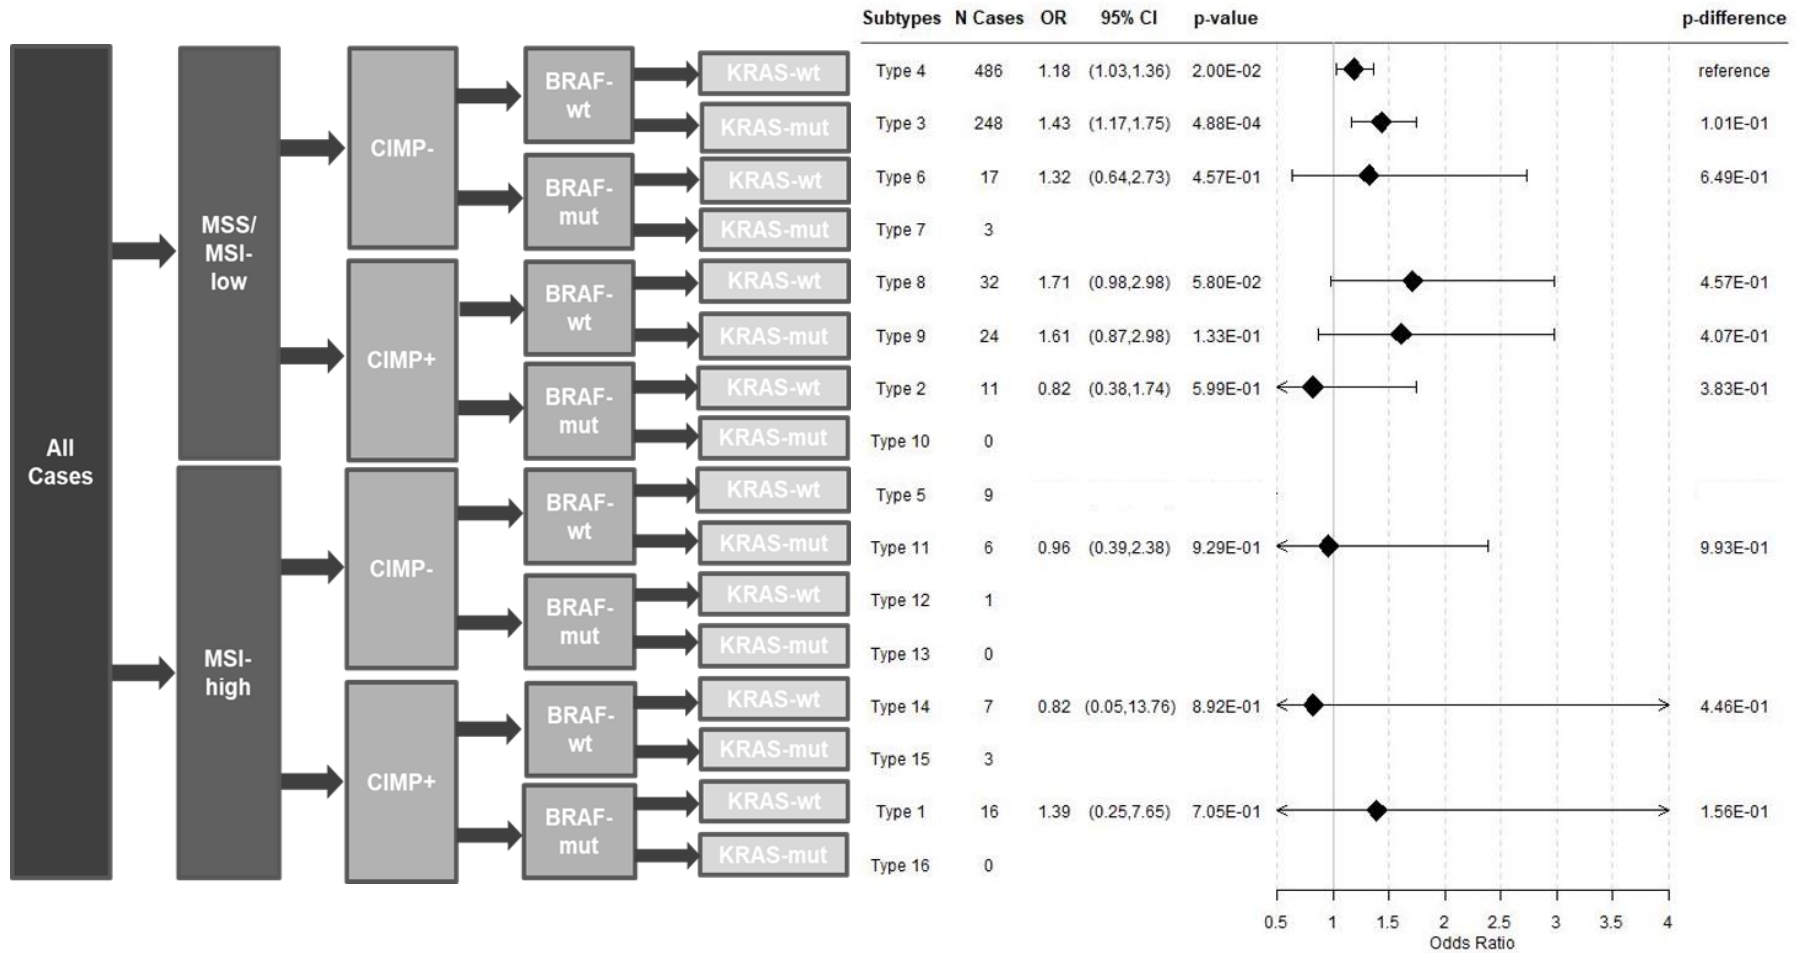

### D) Distal colon: Current smokers vs. never smokers

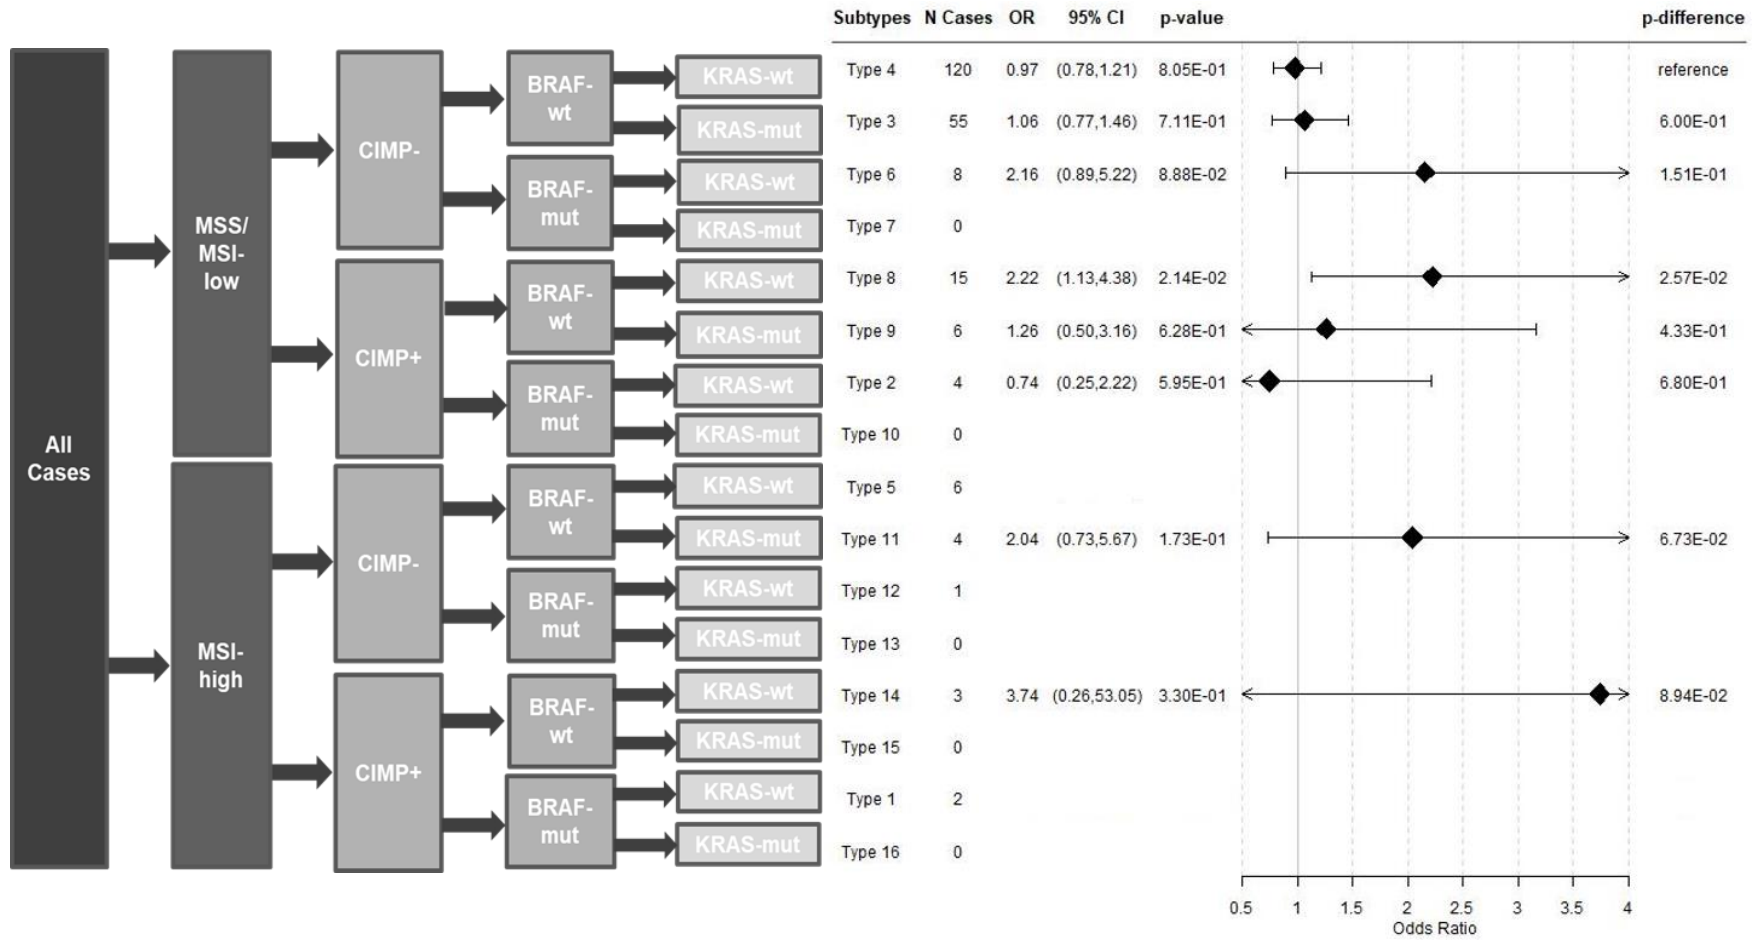

### E) Rectum: Former smokers vs. never smokers

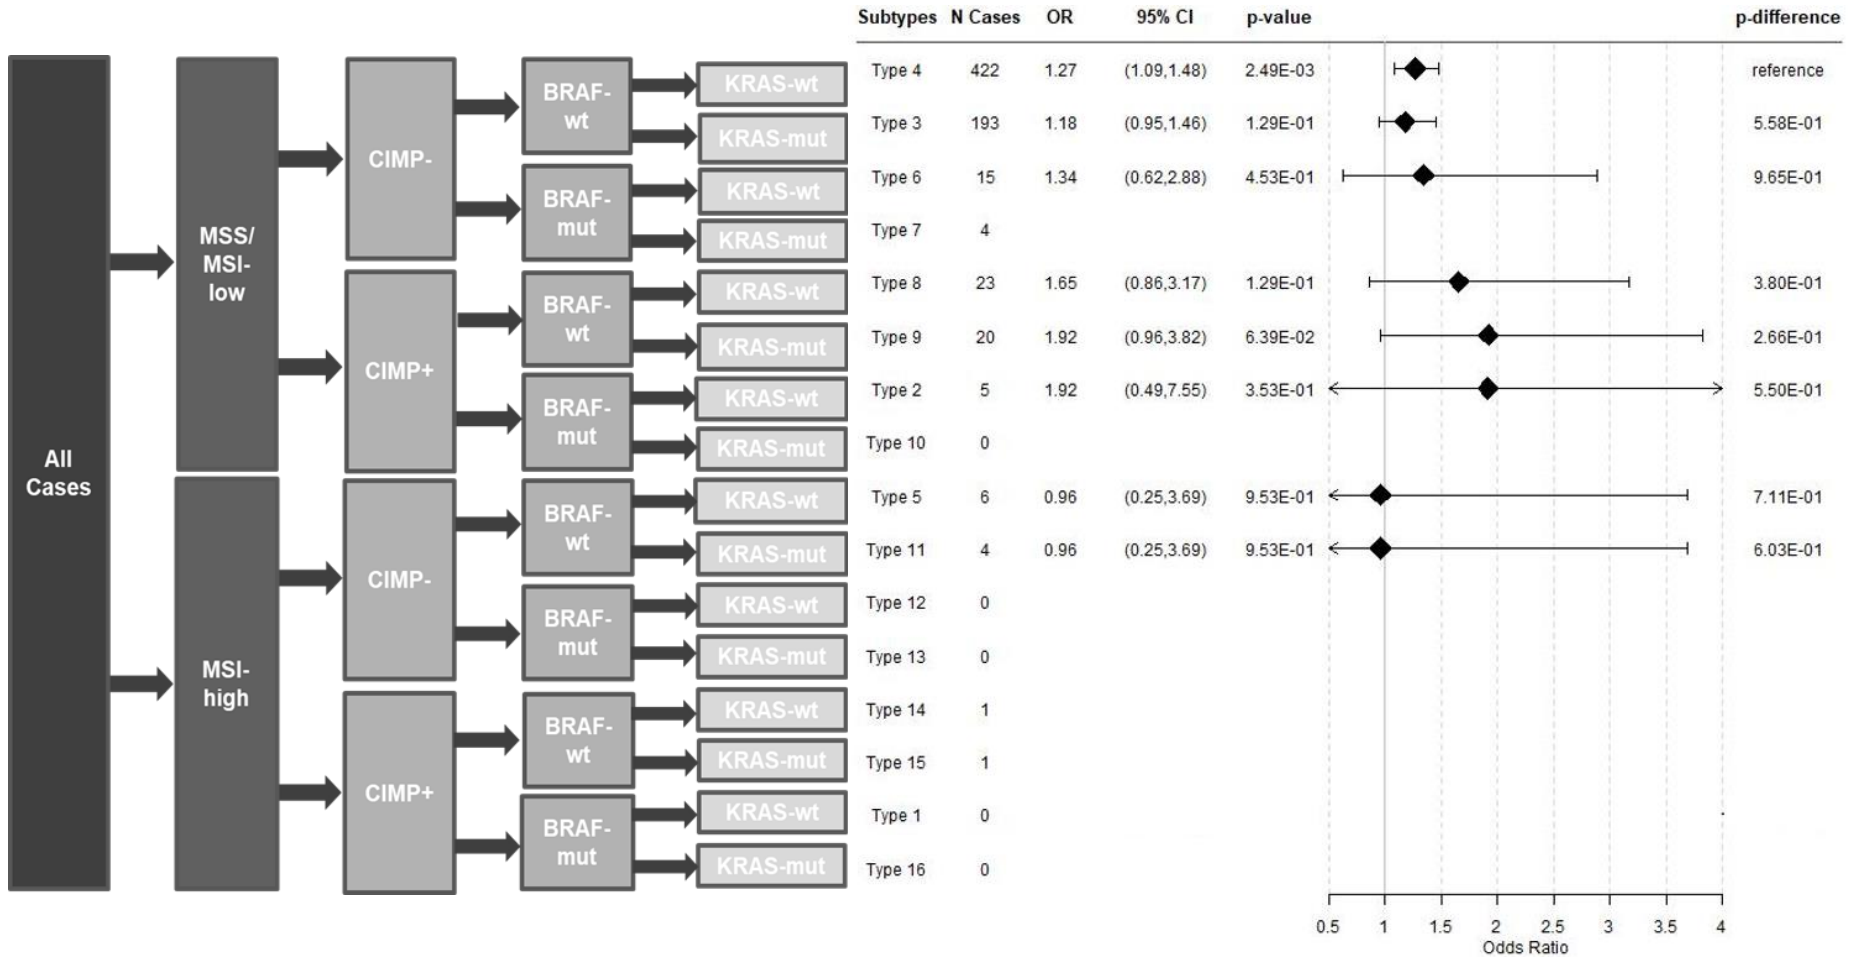



## F) Rectum: Current smokers vs. never smokers

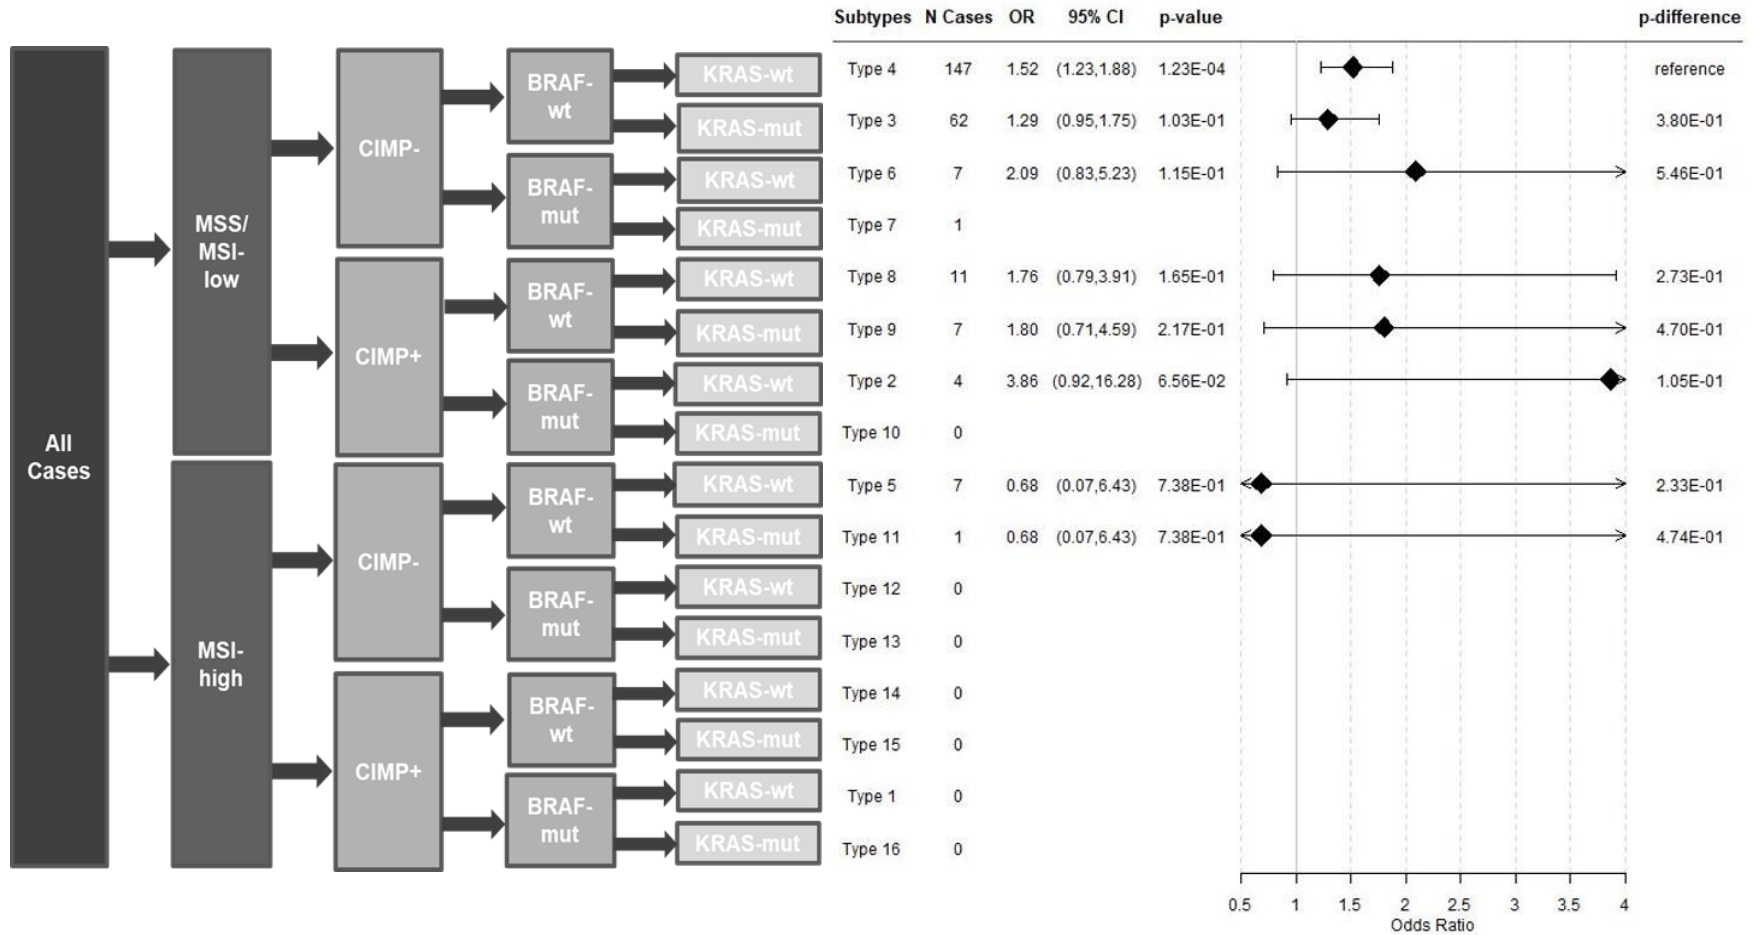

MSS: microsatellite stable; MSI: microsatellite instability; CIMP: CpG island methylation phenotype; wt: wild type; mut: mutated; OR: odds ratio; 95% CI: 95% confidence interval; Two-sided Wald test was used to calculate the P values from the case-control analysis (N controls = 11,231) and case-only analysis (Pdifference). A Bonferroni corrected p-value threshold of  $5.0 \times 10^{-3}$  was used for both case-control and case-only analyses.

**Supplementary Figure 3. Associations between smoking pack-years and risk of CRC subtypes defined by combined marker status, stratified by colonic location**

**A) Proximal colon**

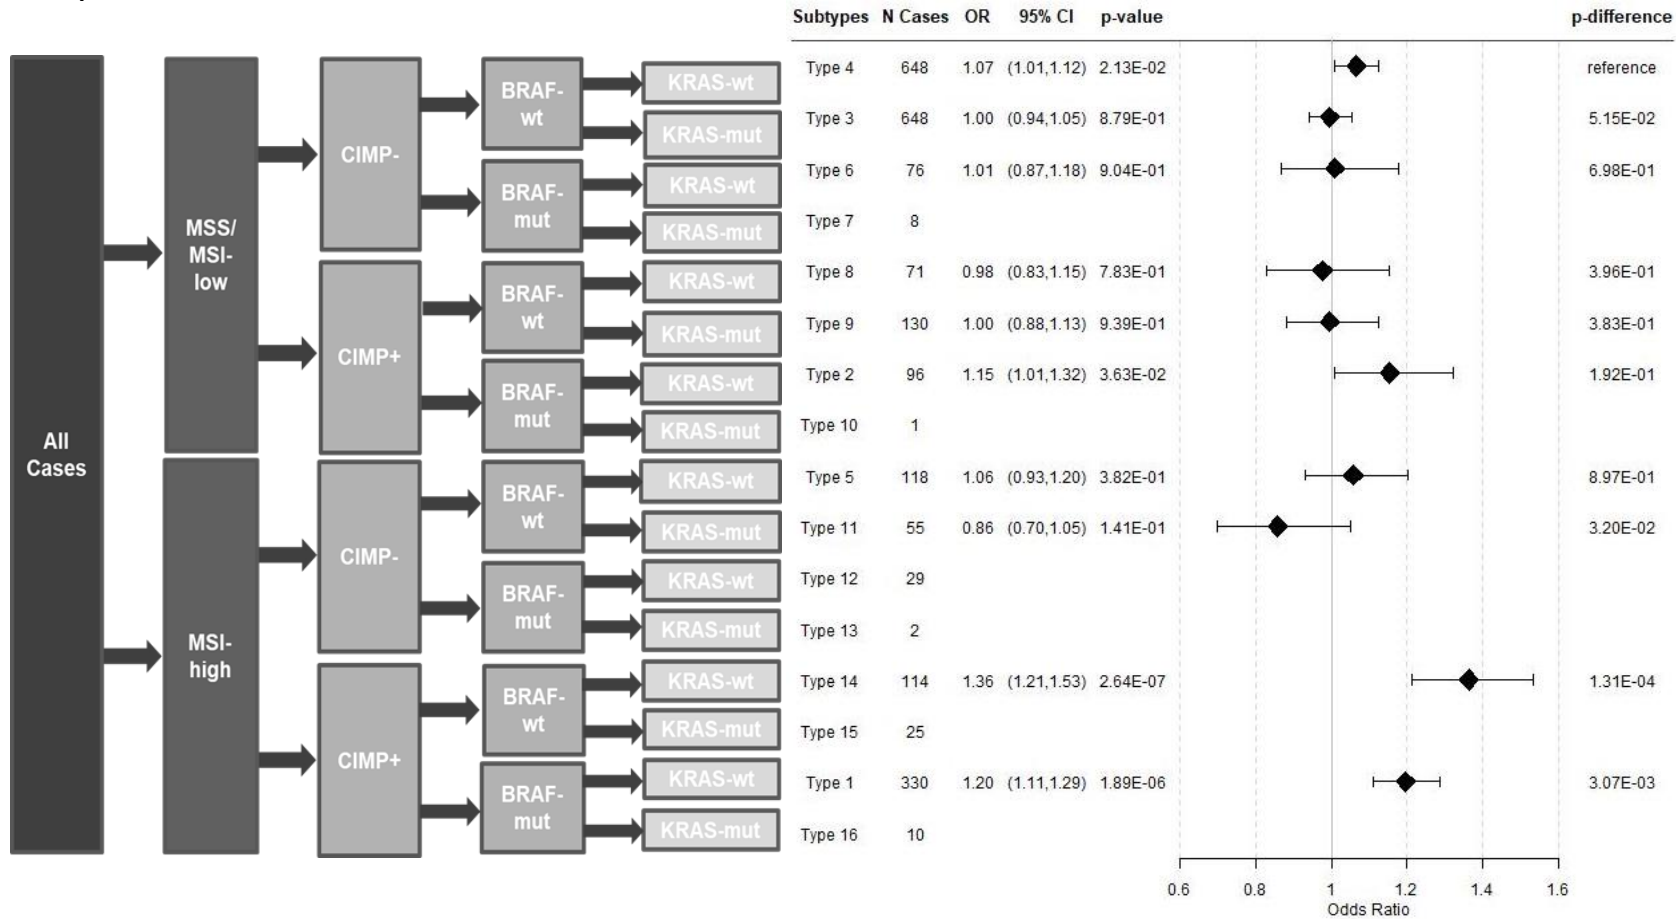

## B) Distal colon

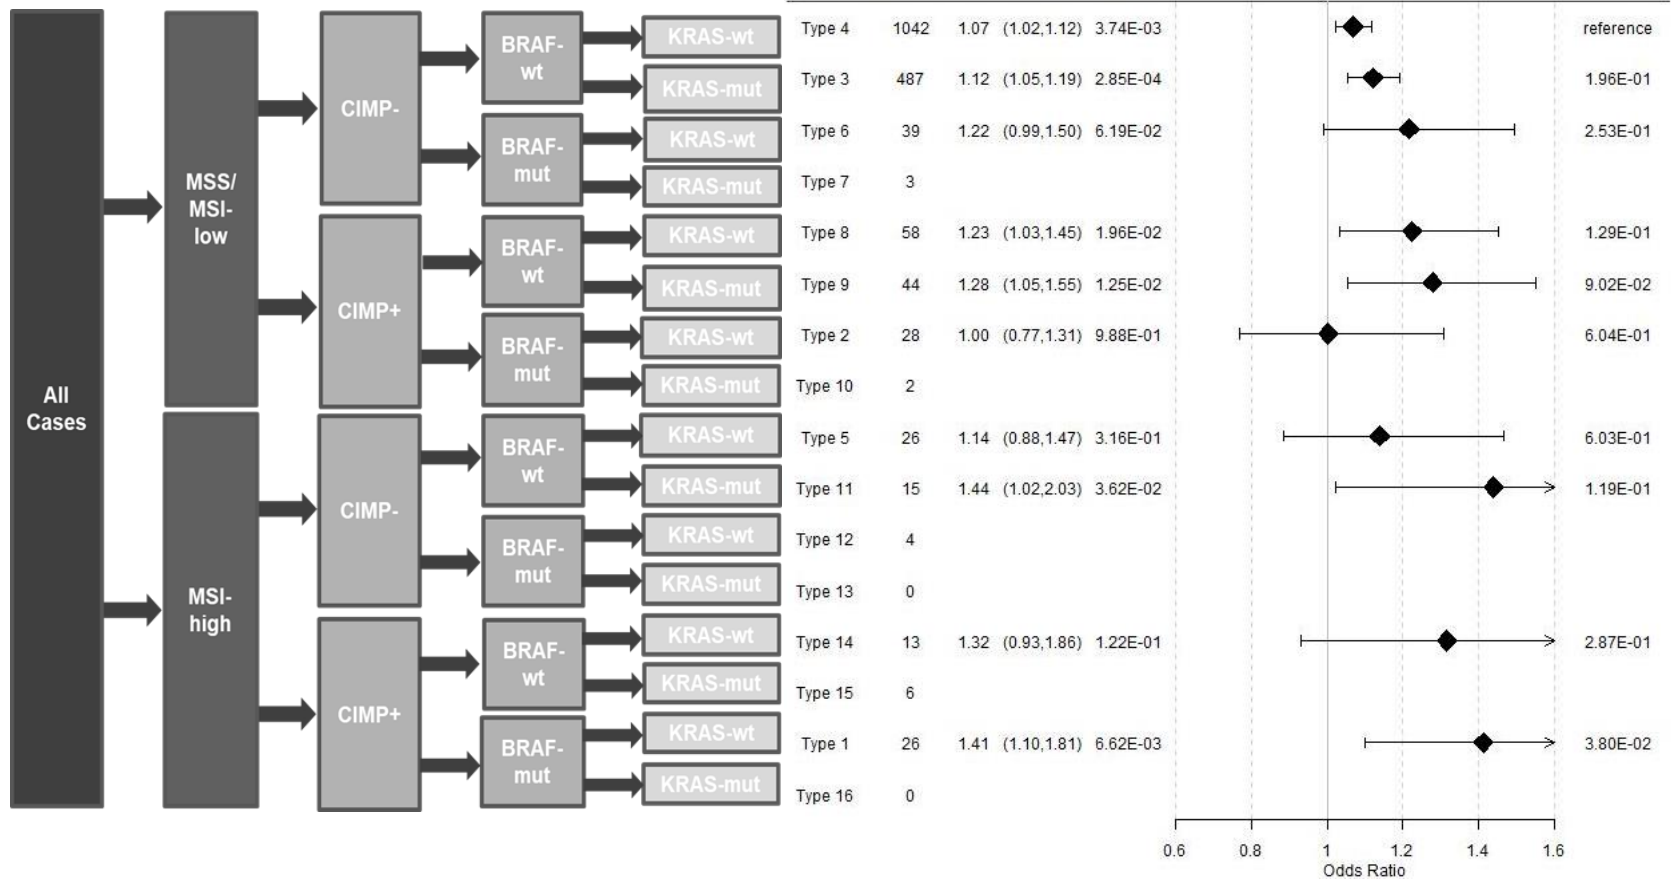

### C) Rectum

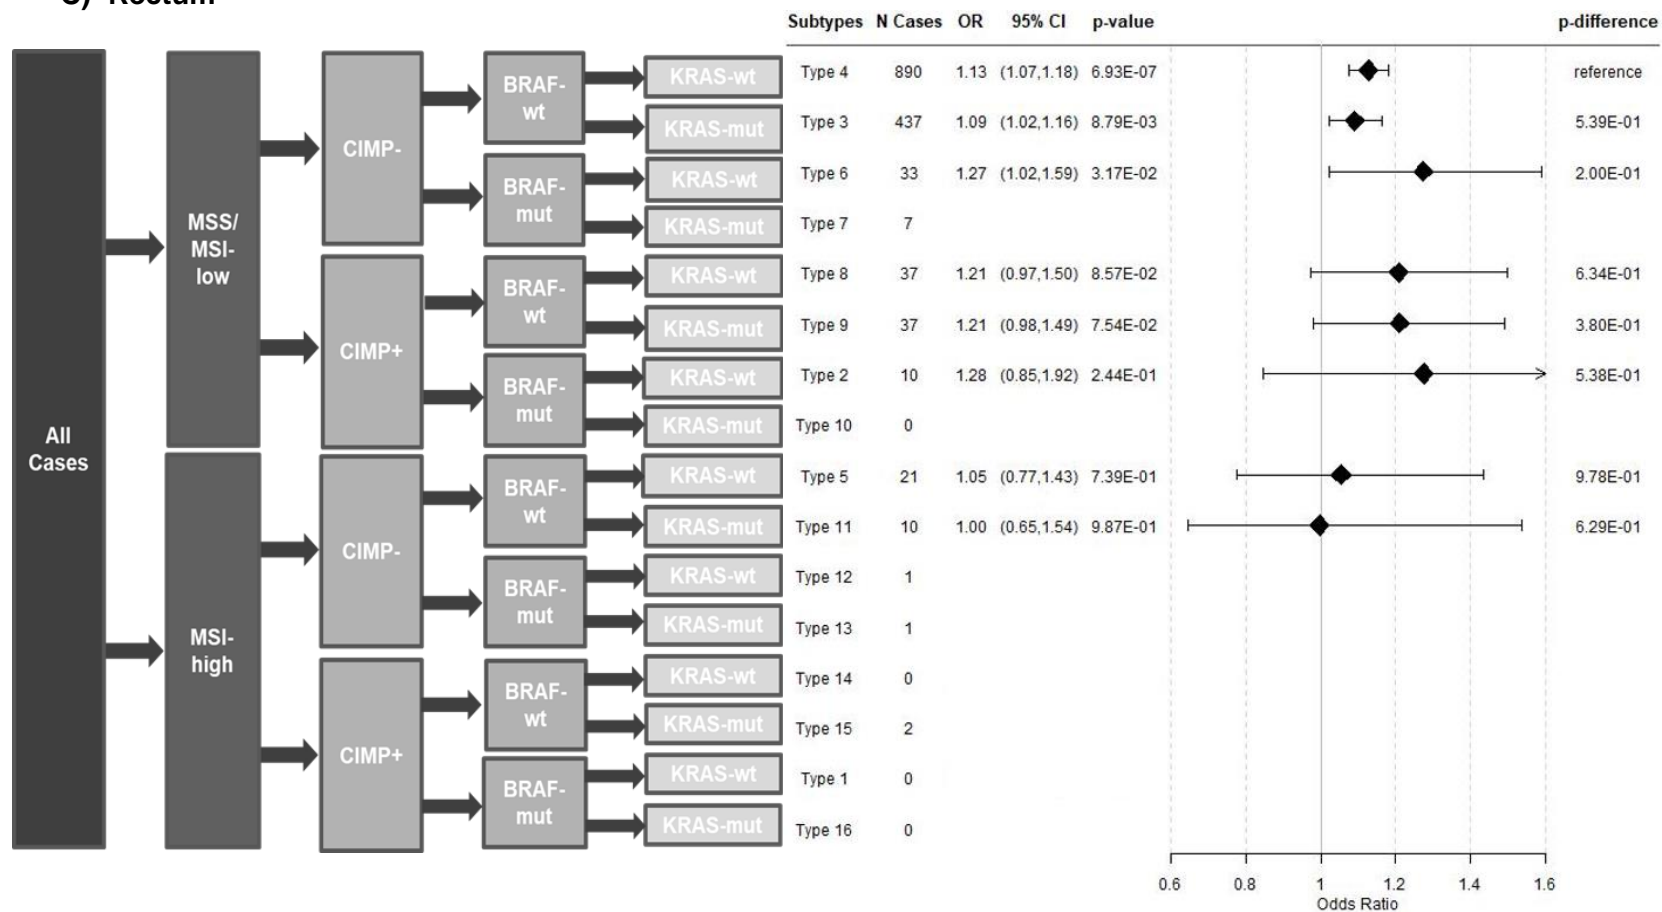

MSS: microsatellite stable; MSI: microsatellite instability; CIMP: CpG island methylation phenotype; wt: wild type; mut: mutated; OR: odds ratio; 95% CI: 95% confidence interval; Two-sided Wald test was used to calculate the P values from the case-control analysis (N controls = 10,199) and case-only analysis (Pdifference). A Bonferroni corrected p-value threshold of  $5.0 \times 10^{-3}$  was used for both case-control and case-only analyses.

Supplementary Figure 4. Association between former and current smokers and risk of CRC subtypes defined by combined marker status, stratified by sex

A) Male: Former smokers vs. never smokers

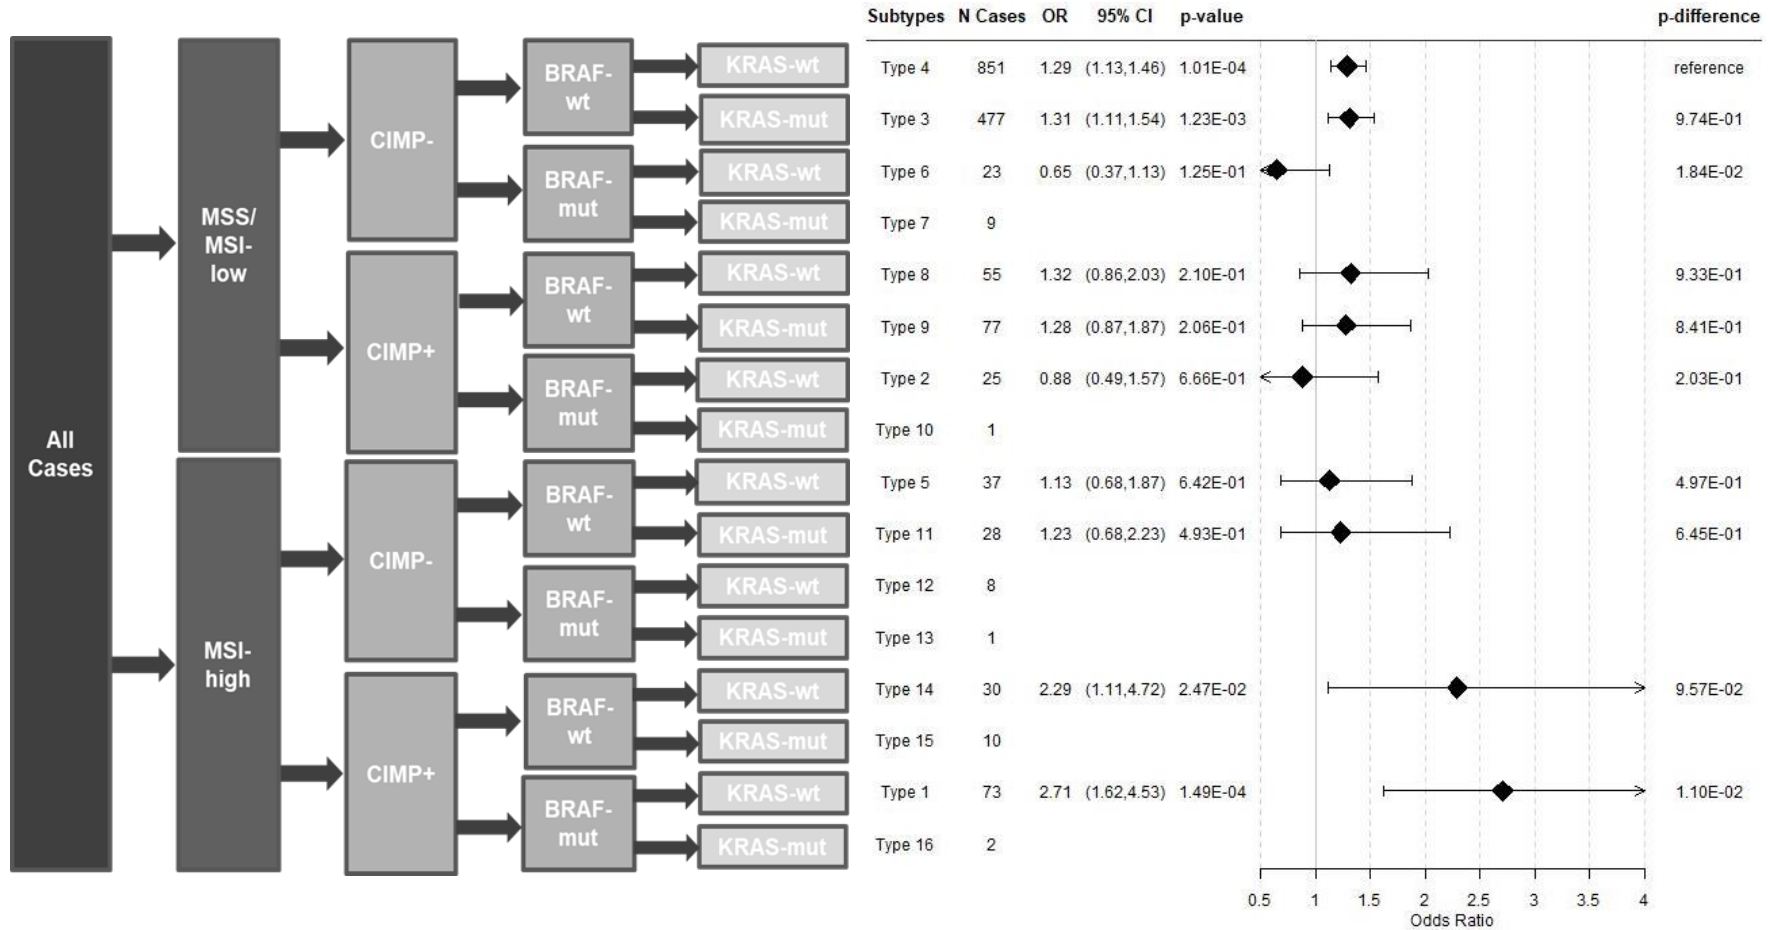

## B) Male: Current smokers vs. never smokers

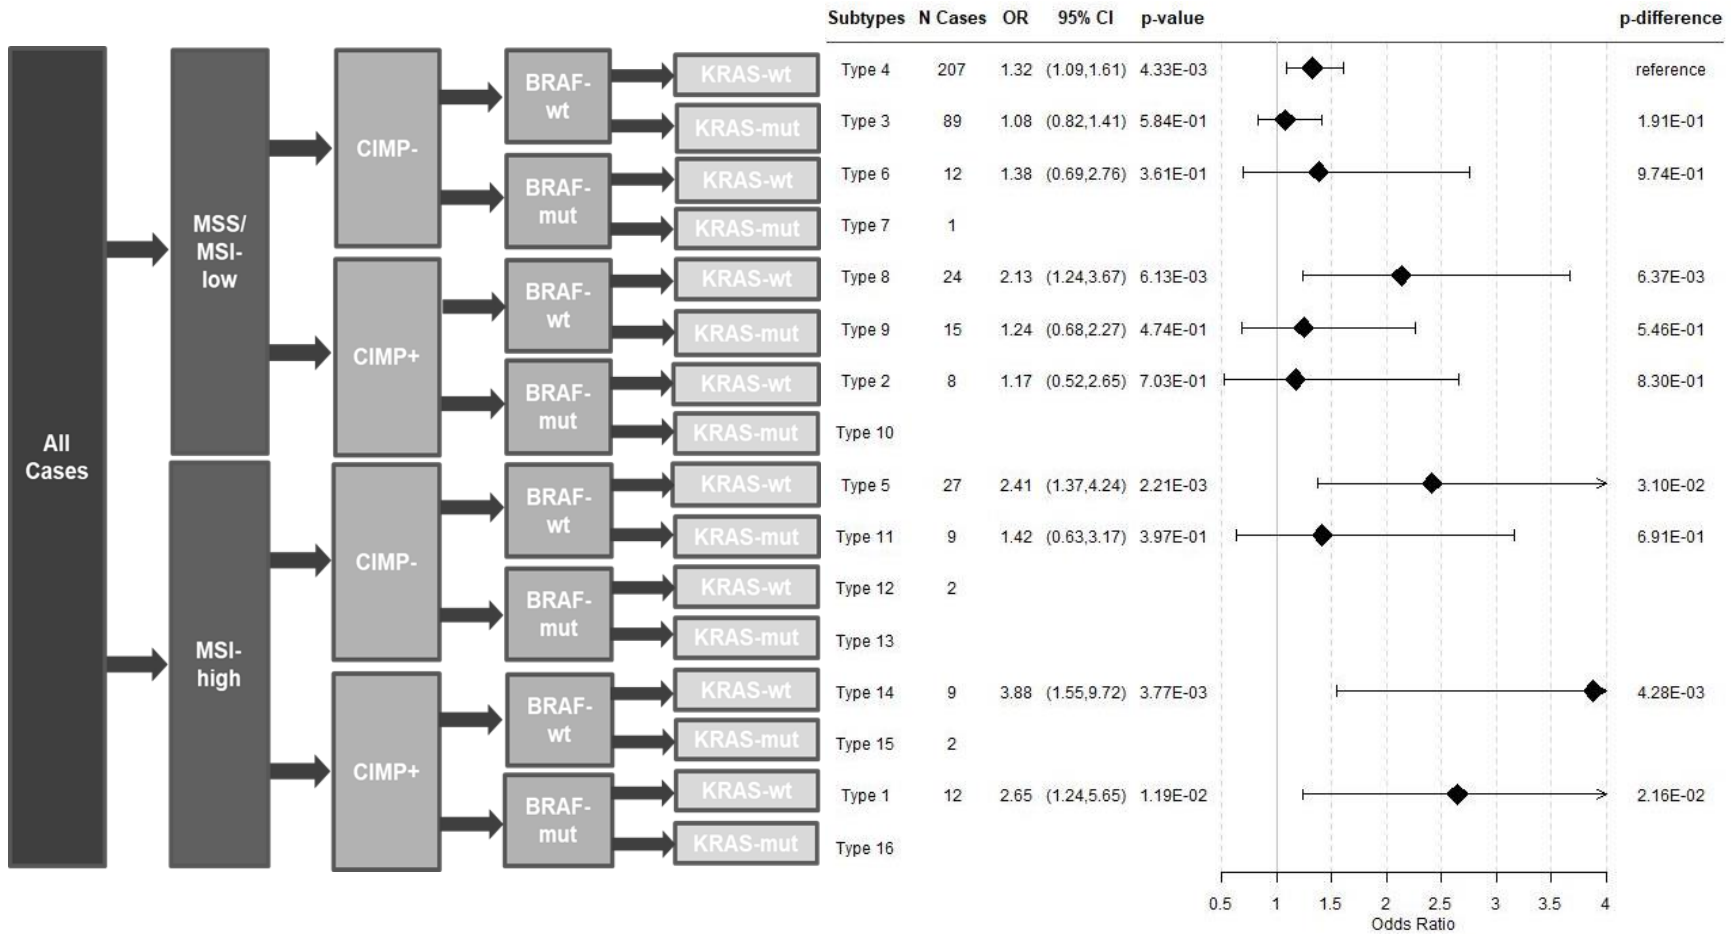

### C) Female: Former smokers vs. never smokers

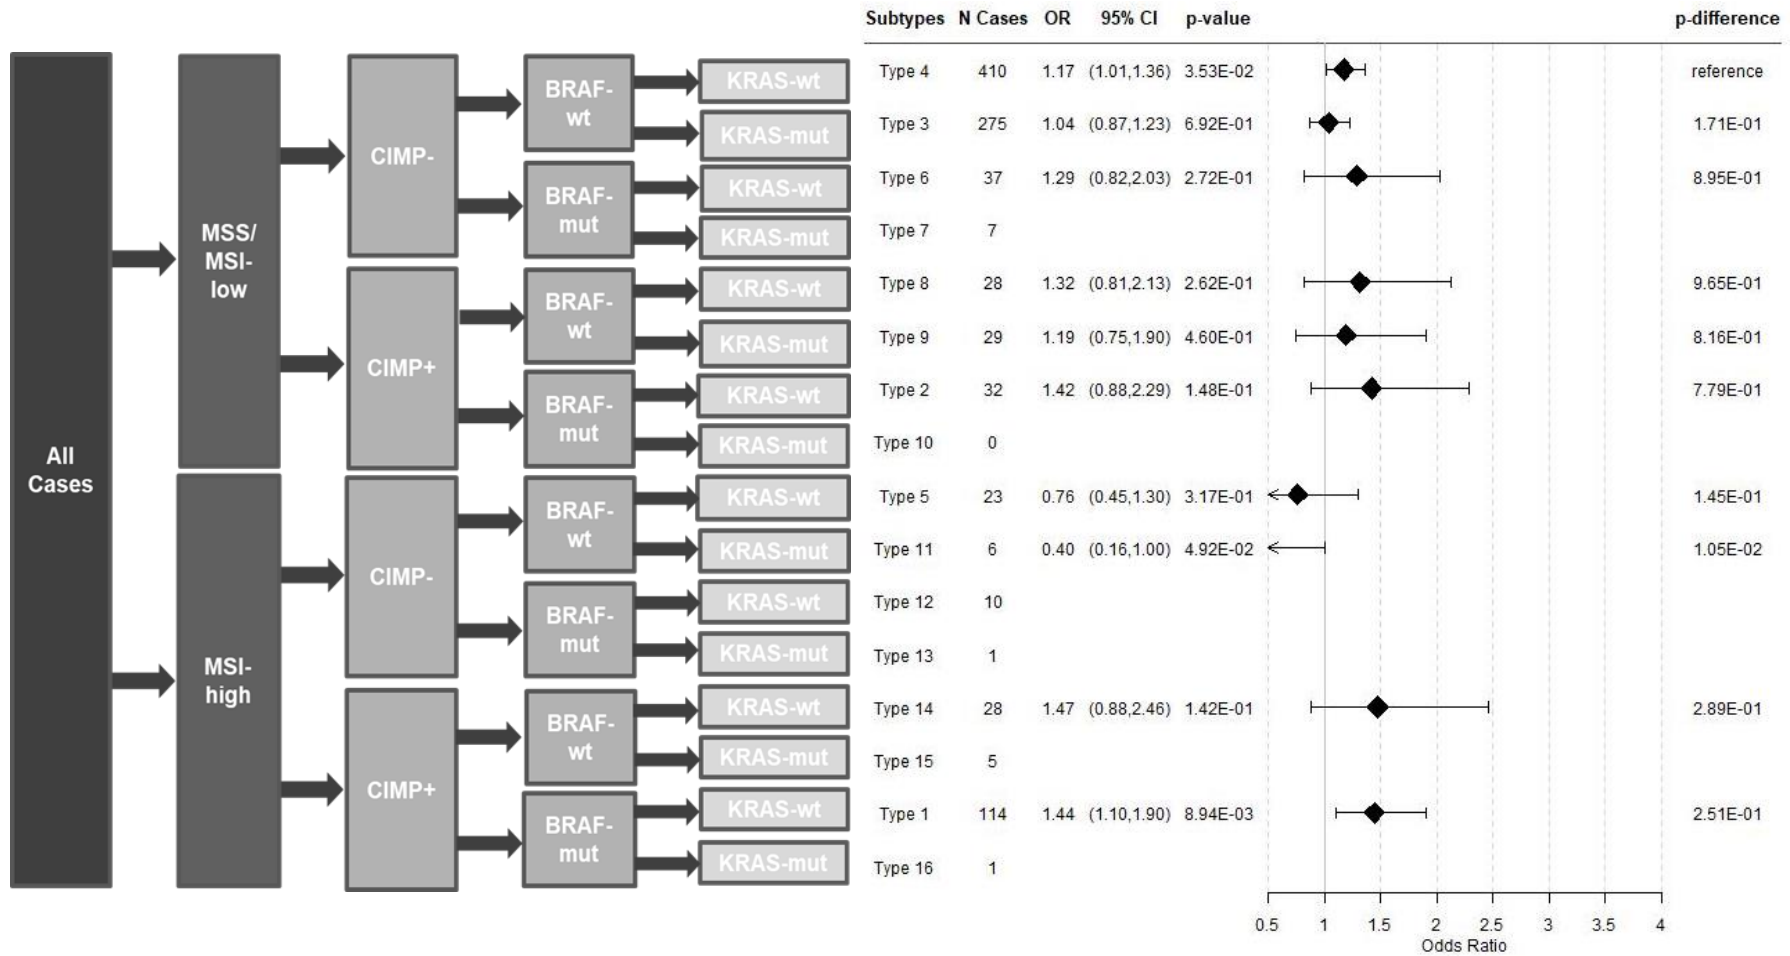

### D) Current smokers vs. never smokers

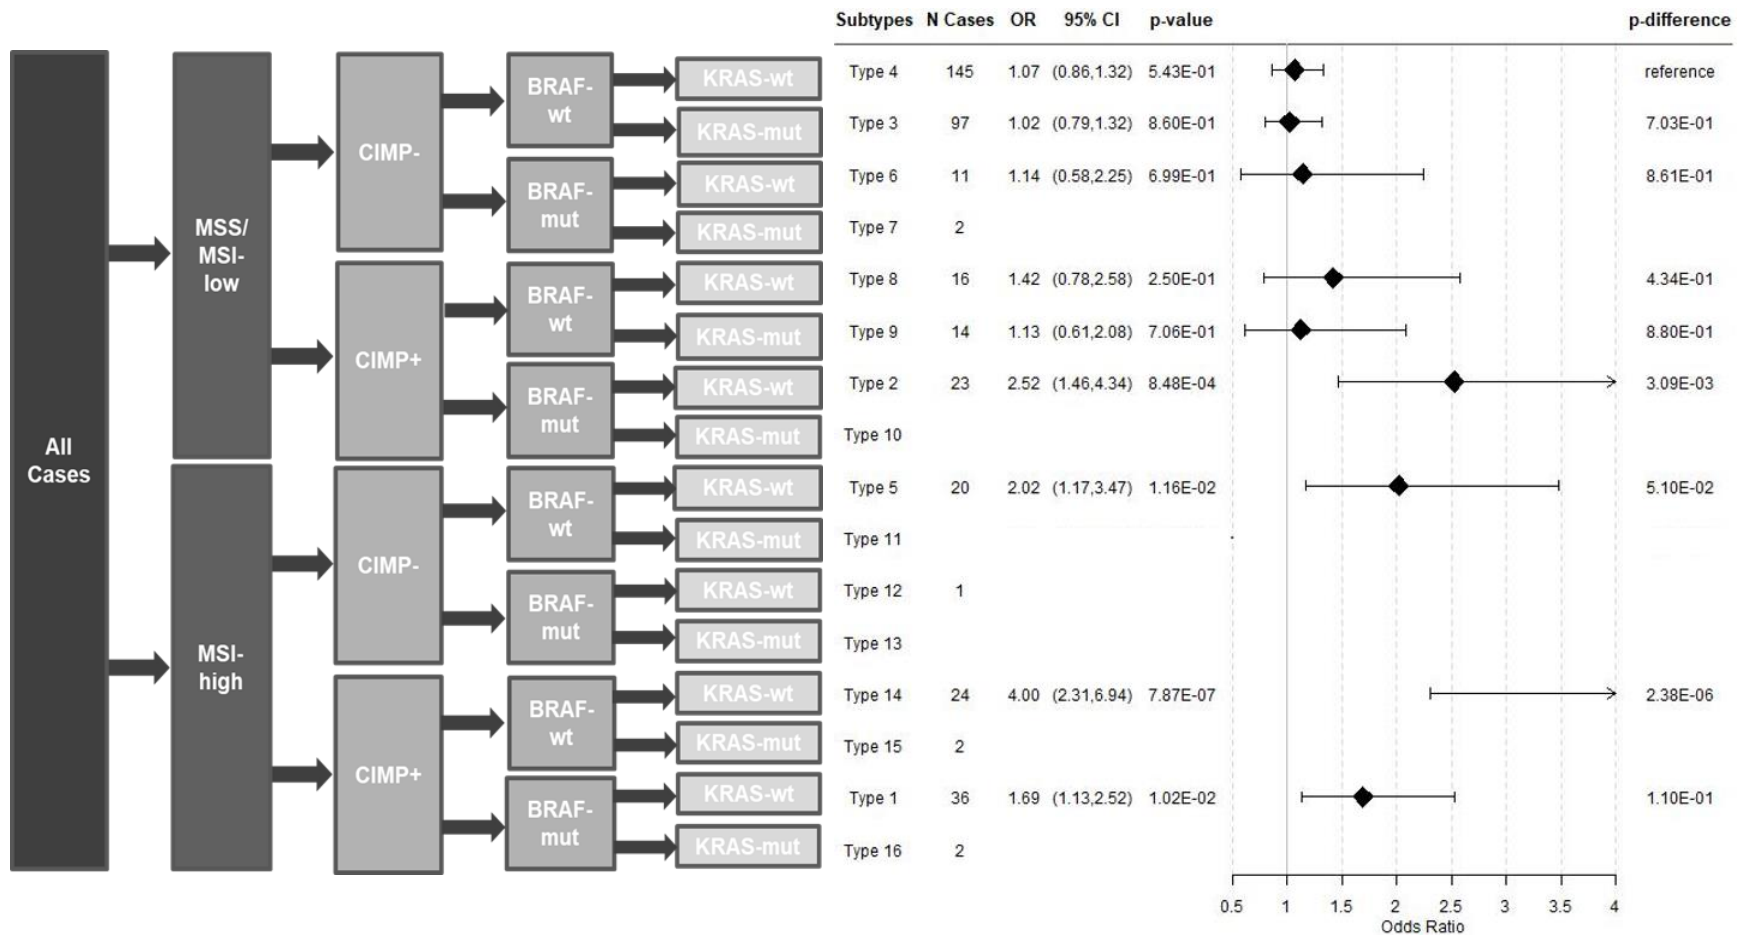

MSS: microsatellite stable; MSI: microsatellite instability; CIMP: CpG island methylation phenotype; wt: wild type; mut: mutated; OR: odds ratio; 95% CI: 95% confidence interval; Two-sided Wald test was used to calculate the P values from the case-control analysis (N controls = 5,987 for male and N controls = 5,675 for female) and case-only analysis (P<sub>difference</sub>). A Bonferroni corrected p-value threshold of  $5.0 \times 10^{-3}$  was used for both case-control and case-only analyses.



Supplementary Figure 5. Associations between smoking pack-years and risk of CRC subtypes defined by combined marker status, stratified by sex

A) Male

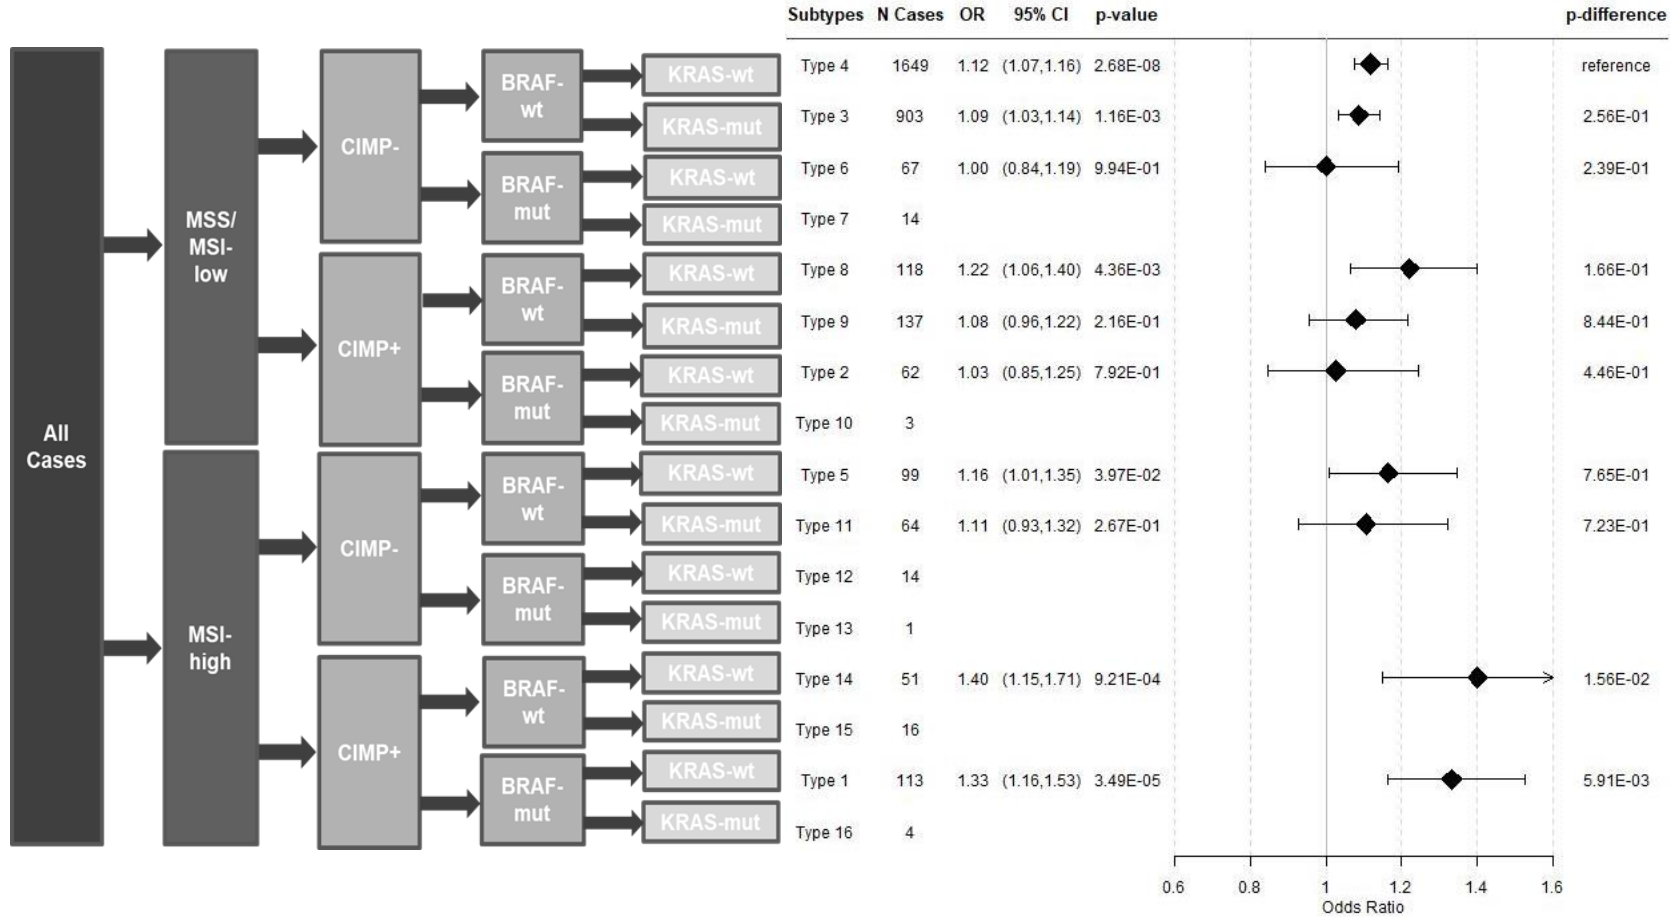

## B) Female

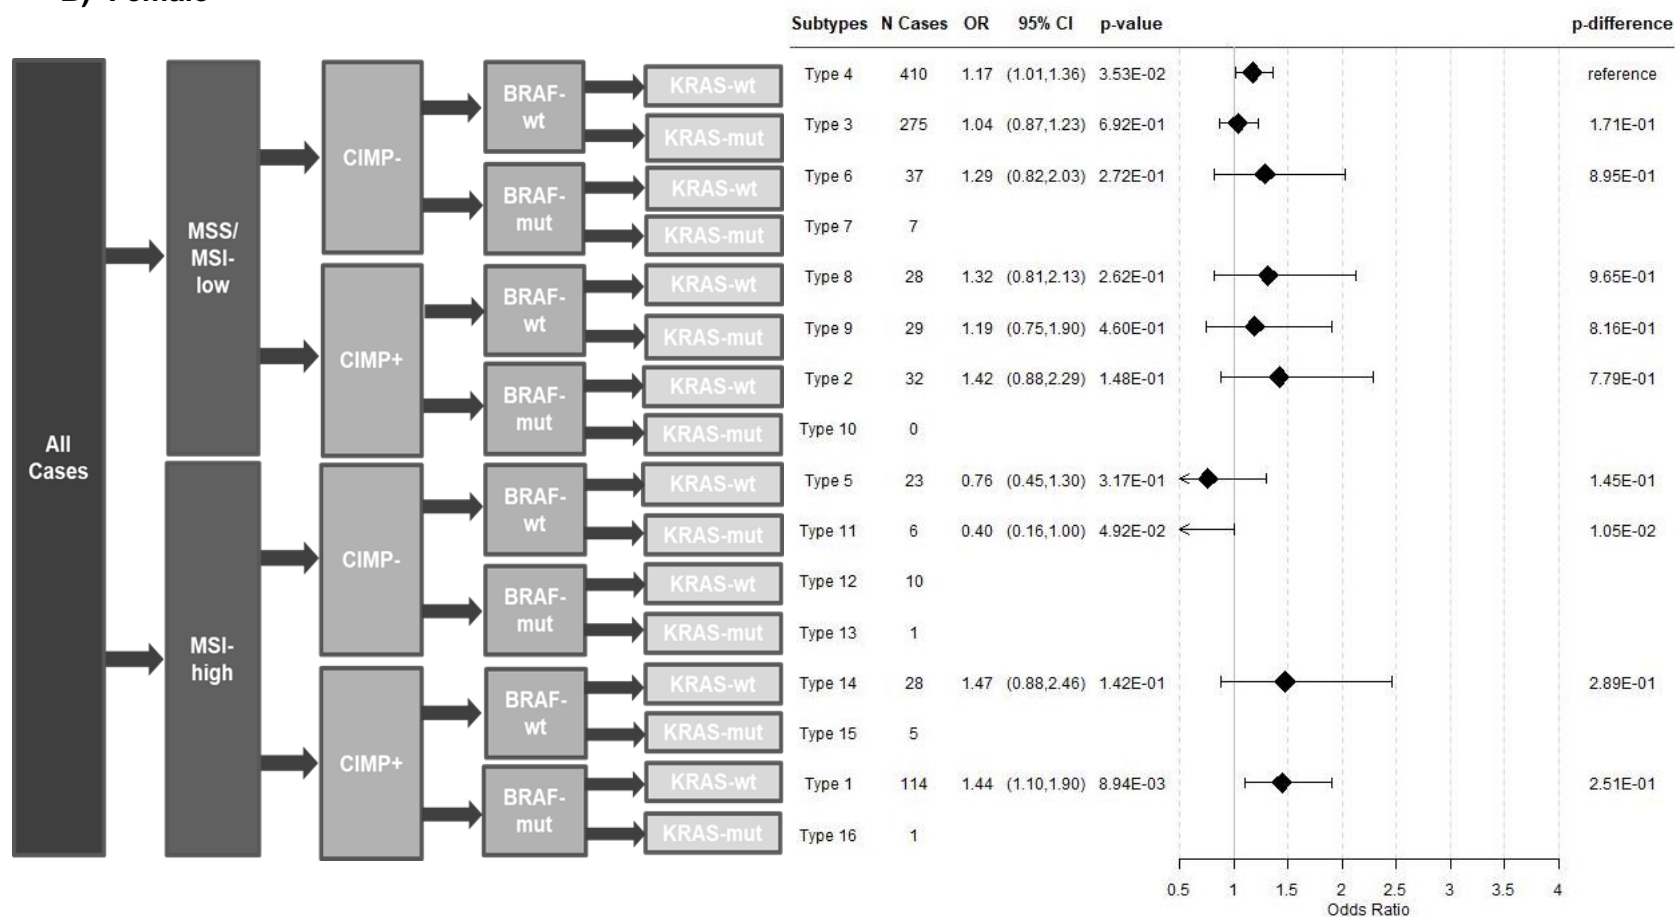

MSS: microsatellite stable; MSI: microsatellite instability; CIMP: CpG island methylation phenotype; wt: wild type; mut: mutated; OR: odds ratio; 95% CI: 95% confidence interval; Two-sided Wald test was used to calculate the P values from the case-control analysis (N controls = 5,987 for male and N controls = 5,675 for female) and case-only analysis (Pdifference). A Bonferroni corrected p-value threshold of  $5.0 \times 10^{-3}$  was used for both case-control and case-only analyses.

Supplementary Figure 6. Association between former and current smokers and risk of CRC subtypes defined by combined marker status, stratified by study design

A) Cohort: Former smokers vs. never smokers

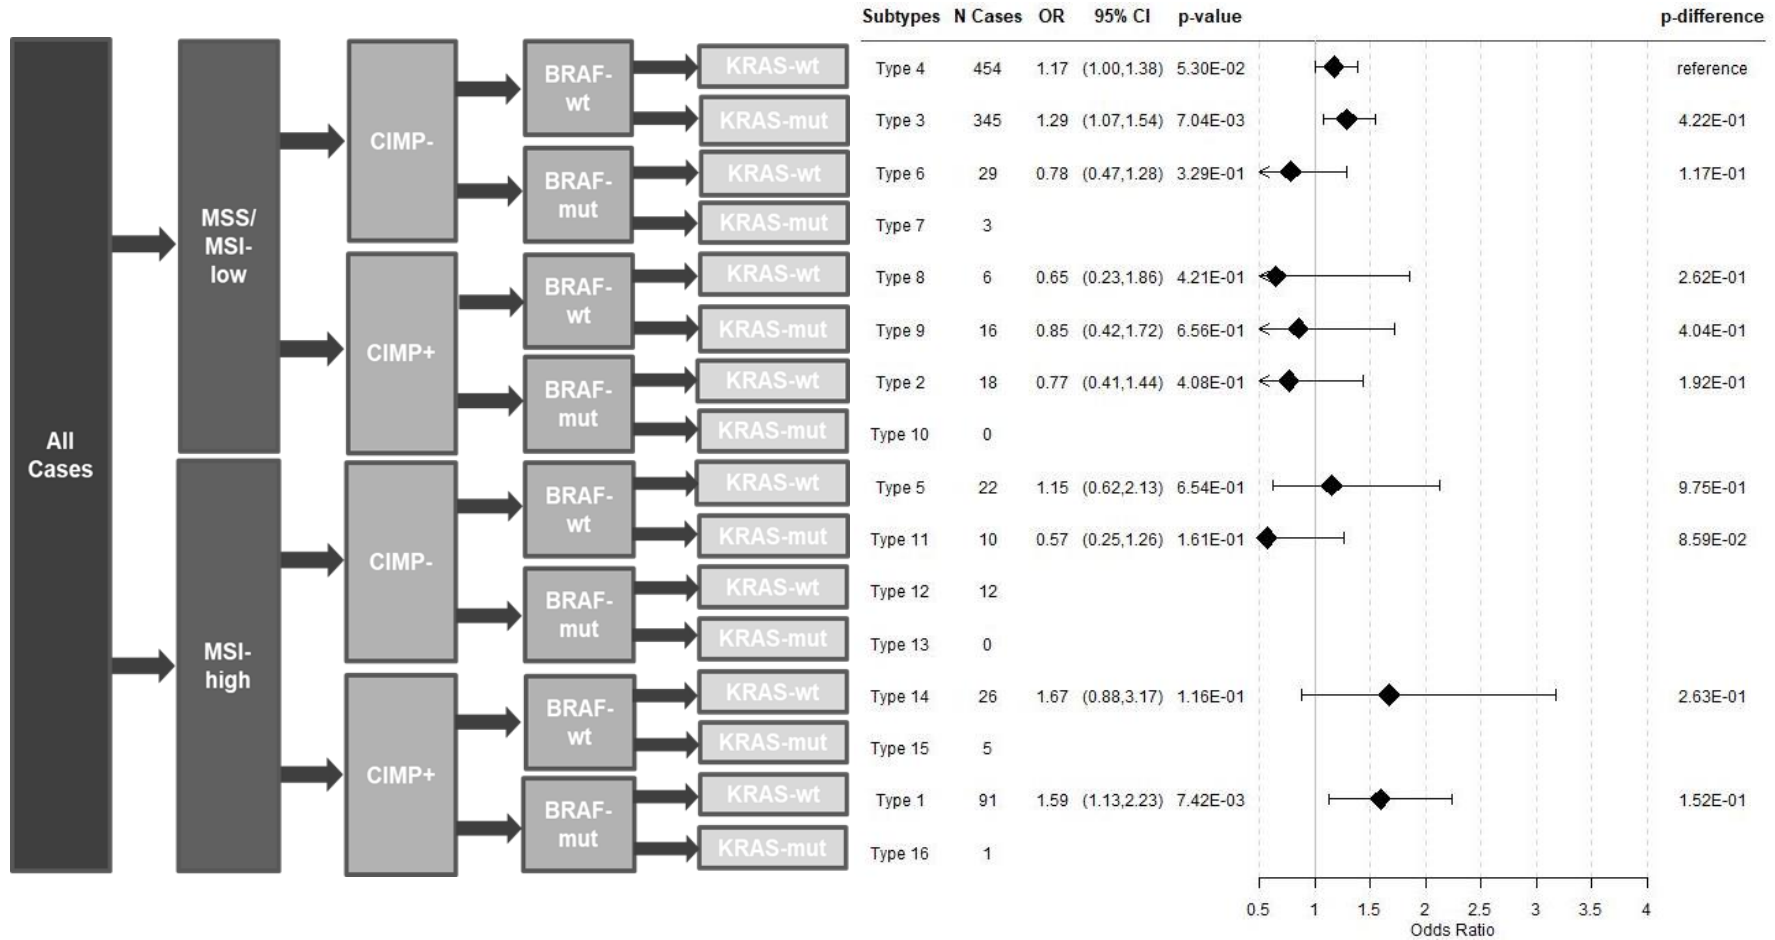

## B) Cohort: Current smokers vs. never smokers

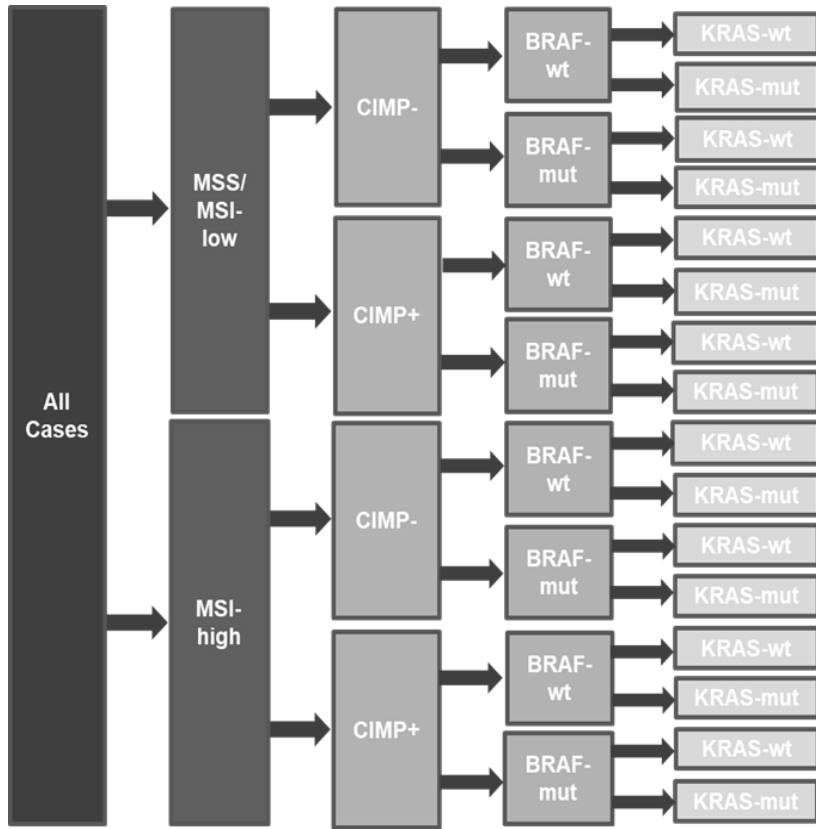

| Subtypes | N Cases | OR   | 95% CI       | p-value  | p-difference |
|----------|---------|------|--------------|----------|--------------|
| Type 4   | 94      | 1.33 | (1.01,1.75)  | 4.19E-02 | reference    |
| Type 3   | 60      | 1.24 | (0.90,1.71)  | 1.86E-01 | 5.25E-01     |
| Type 6   | 9       | 1.09 | (0.51,2.30)  | 8.27E-01 | 6.11E-01     |
| Type 7   | 0       |      |              |          |              |
| Type 8   | 4       | 2.91 | (0.86,9.83)  | 8.51E-02 | 2.53E-01     |
| Type 9   | 5       | 1.78 | (0.64,5.00)  | 2.71E-01 | 6.17E-01     |
| Type 2   | 9       | 2.00 | (0.90,4.44)  | 8.83E-02 | 4.65E-01     |
| Type 10  | 0       |      |              |          |              |
| Type 5   | 8       | 2.02 | (0.87,4.67)  | 9.97E-02 | 2.53E-01     |
| Type 11  | 2       | 0.66 | (0.15,2.92)  | 5.87E-01 | 2.90E-01     |
| Type 12  | 1       |      |              |          |              |
| Type 13  | 0       |      |              |          |              |
| Type 14  | 11      | 4.76 | (2.12,10.67) | 1.53E-04 | 3.76E-03     |
| Type 15  | 1       |      |              |          |              |
| Type 1   | 20      | 2.13 | (1.24,3.64)  | 5.87E-03 | 2.05E-01     |
| Type 16  | 1       |      |              |          |              |

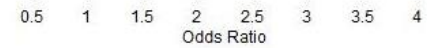

C) Case-control: Former smokers vs. never smokers

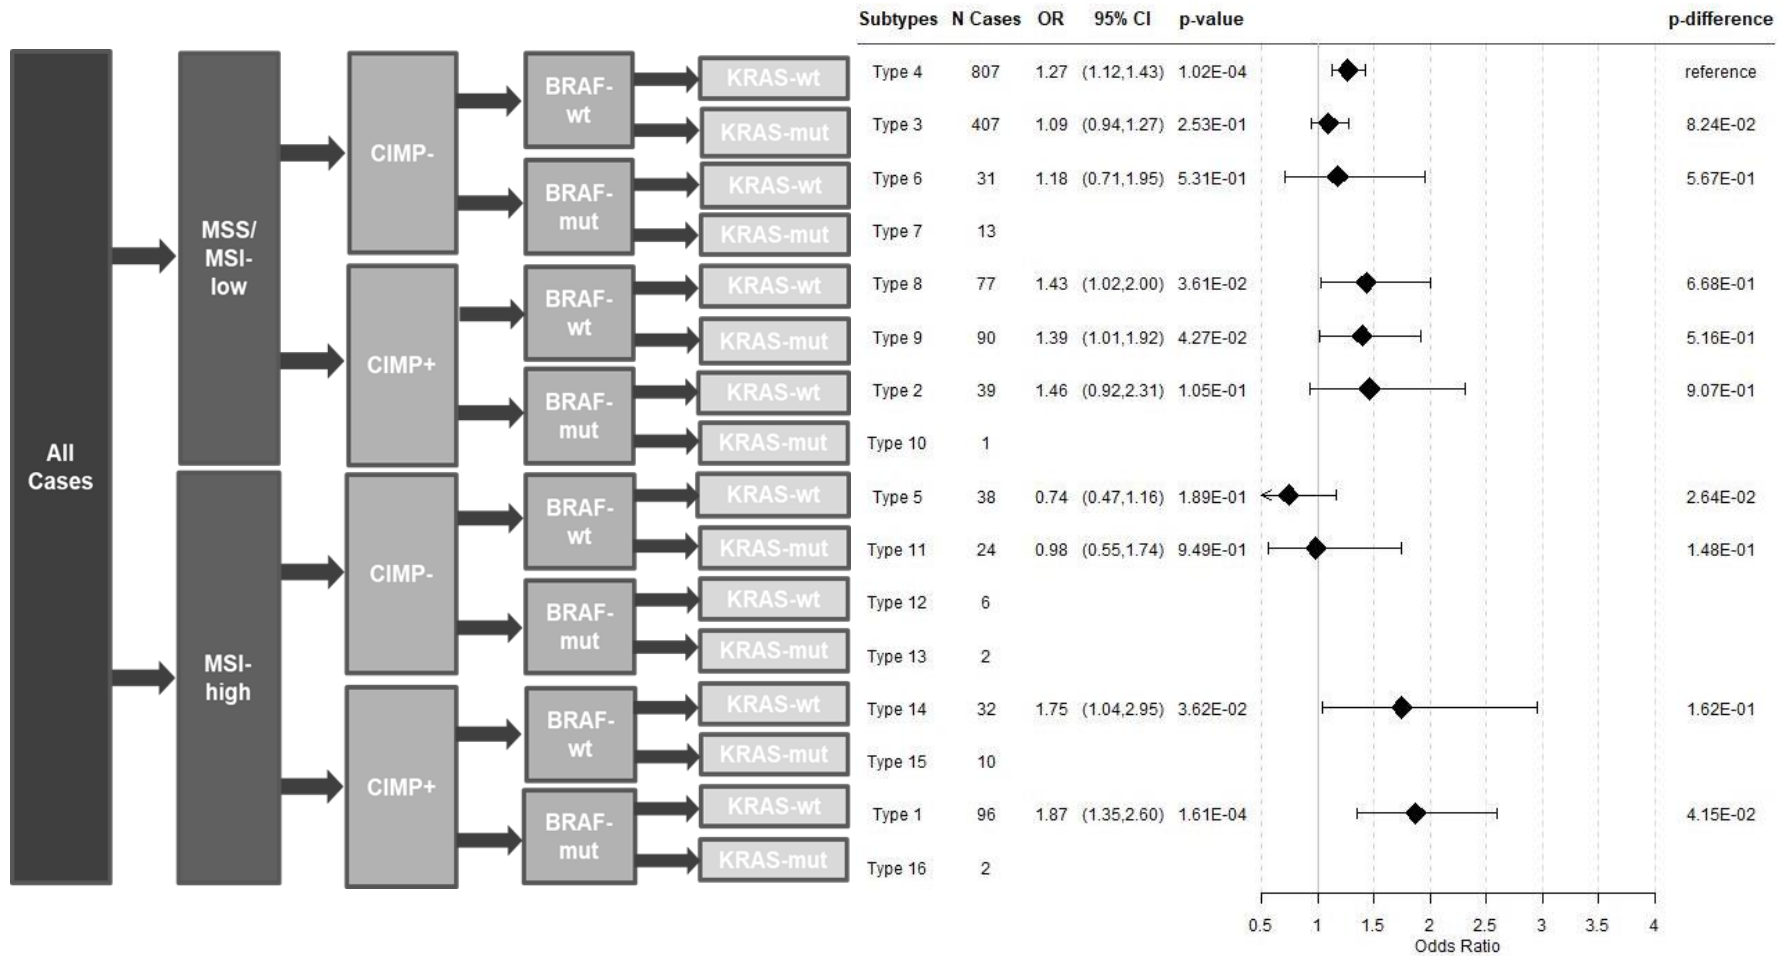

### D) Case-control: Current smokers vs. never smokers

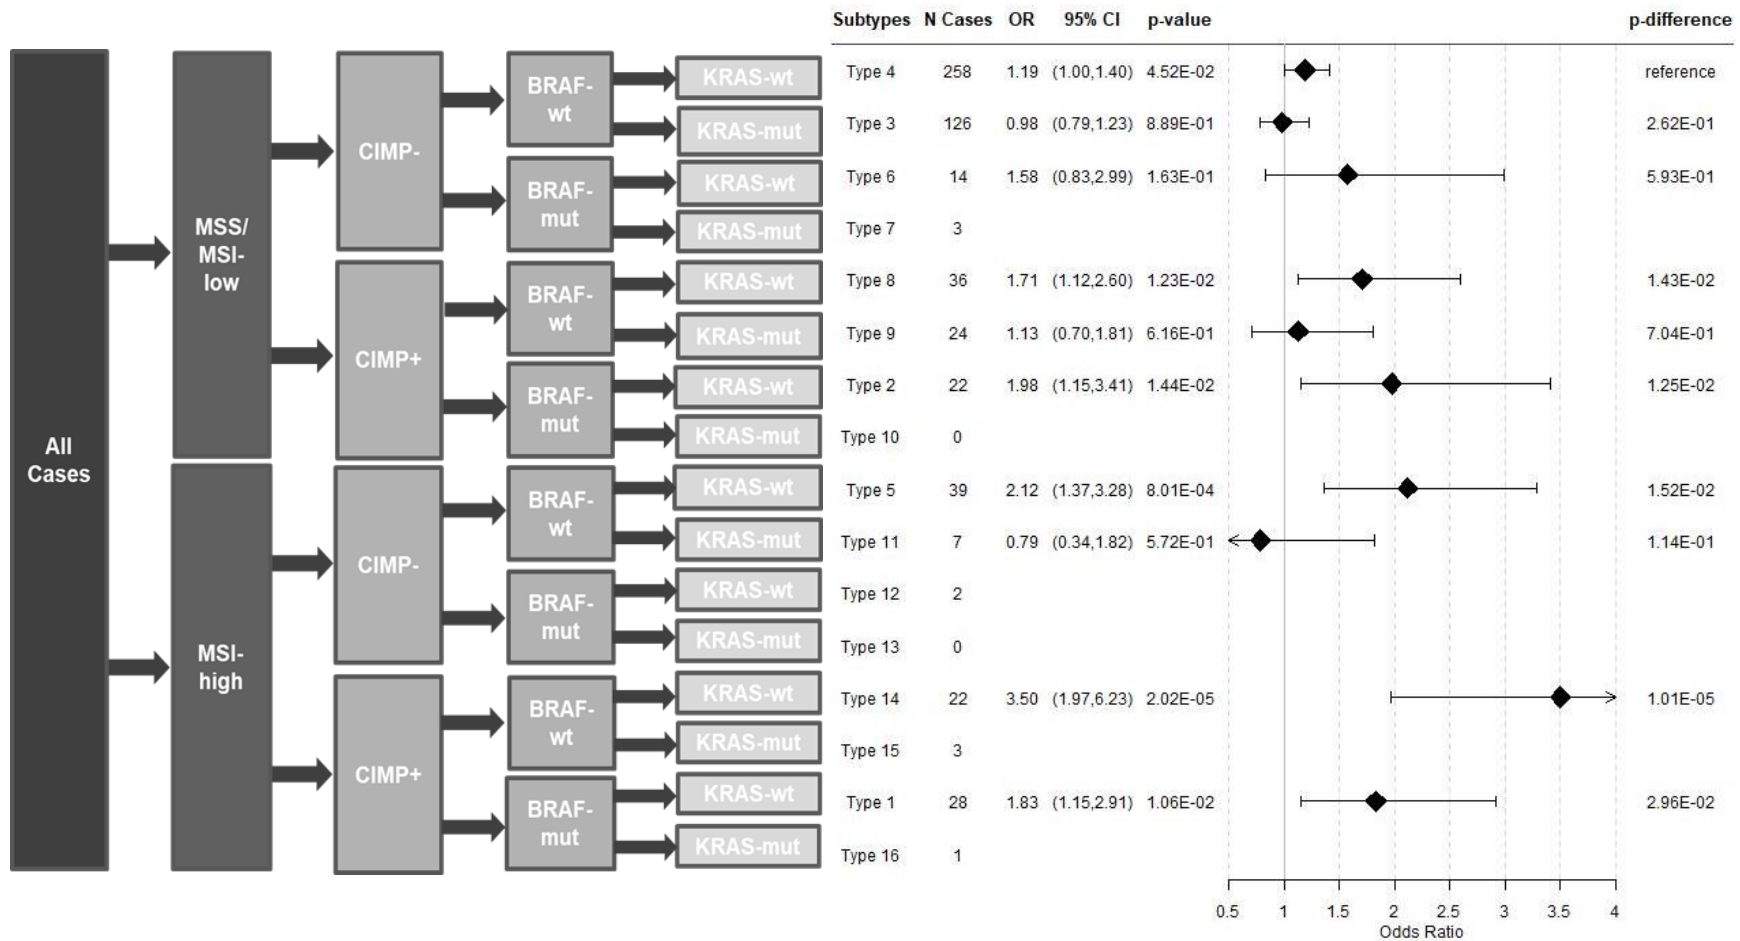

MSS: microsatellite stable; MSI: microsatellite instability; CIMP: CpG island methylation phenotype; wt: wild type; mut: mutated; OR: odds ratio; 95% CI: 95% confidence interval; Two-sided Wald test was used to calculate the P values from the case-control analysis (N controls = 3,184 for cohort and N controls = 8,478 for case-control) and case-only analysis (Pdifference). A Bonferroni corrected p-value threshold of  $5.0 \times 10^{-3}$  was used for both case-control and case-only analyses.

**Supplementary Figure 7. Associations between smoking pack-years and risk of CRC subtypes defined by combined marker status, stratified by study design**

**A) Cohort**

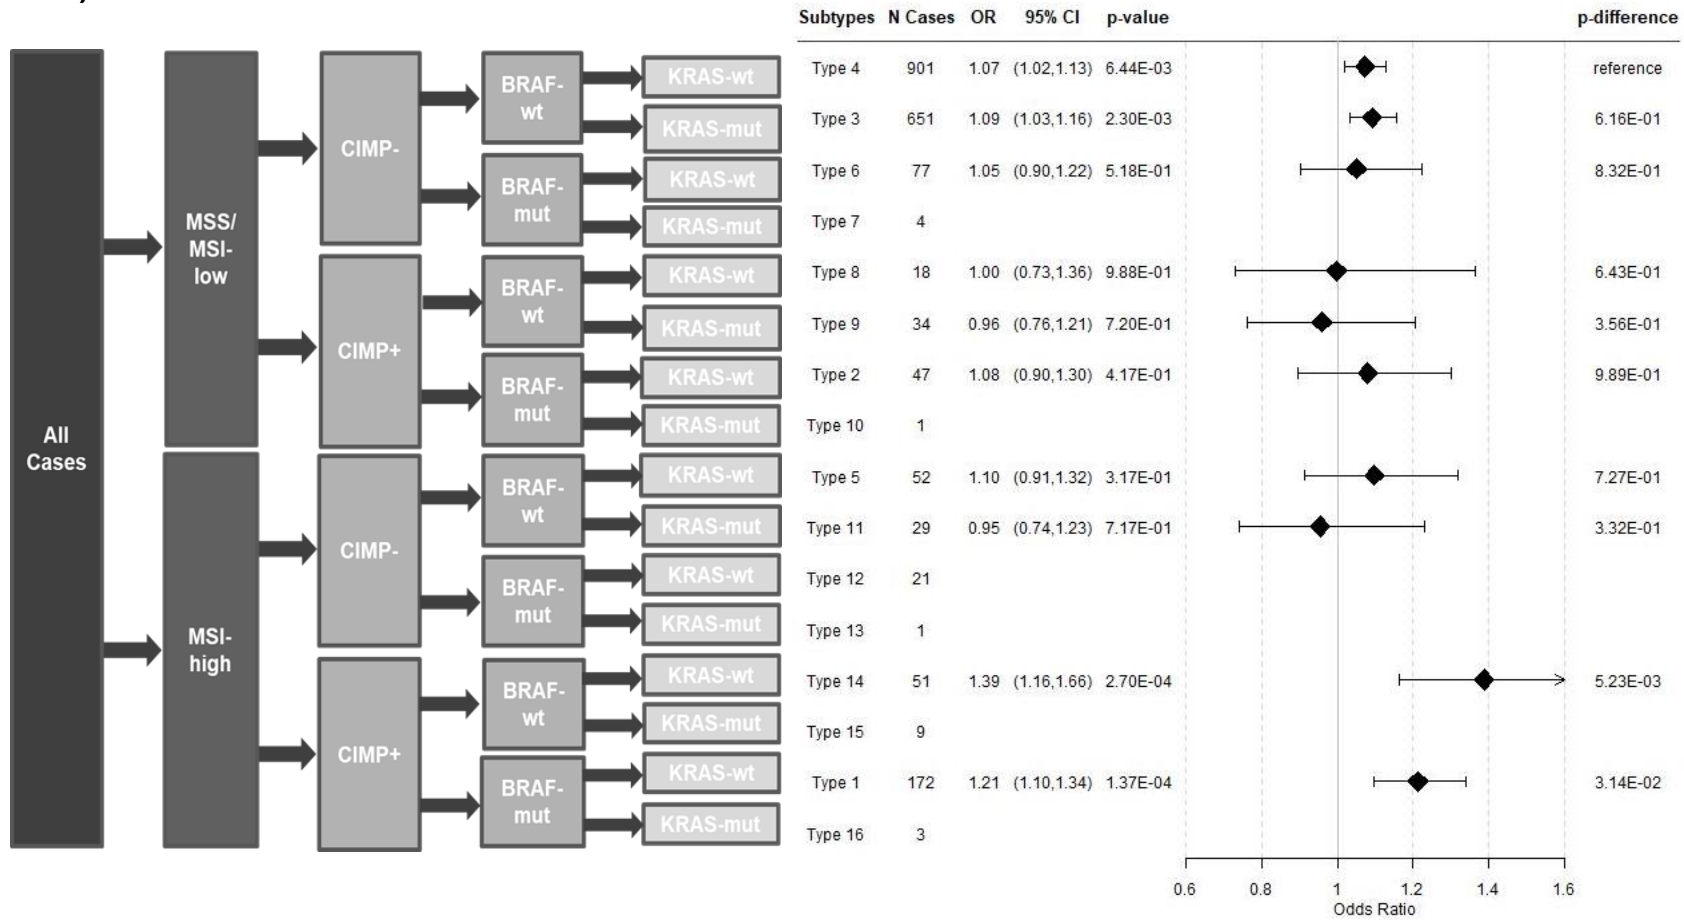

## B) Case-control

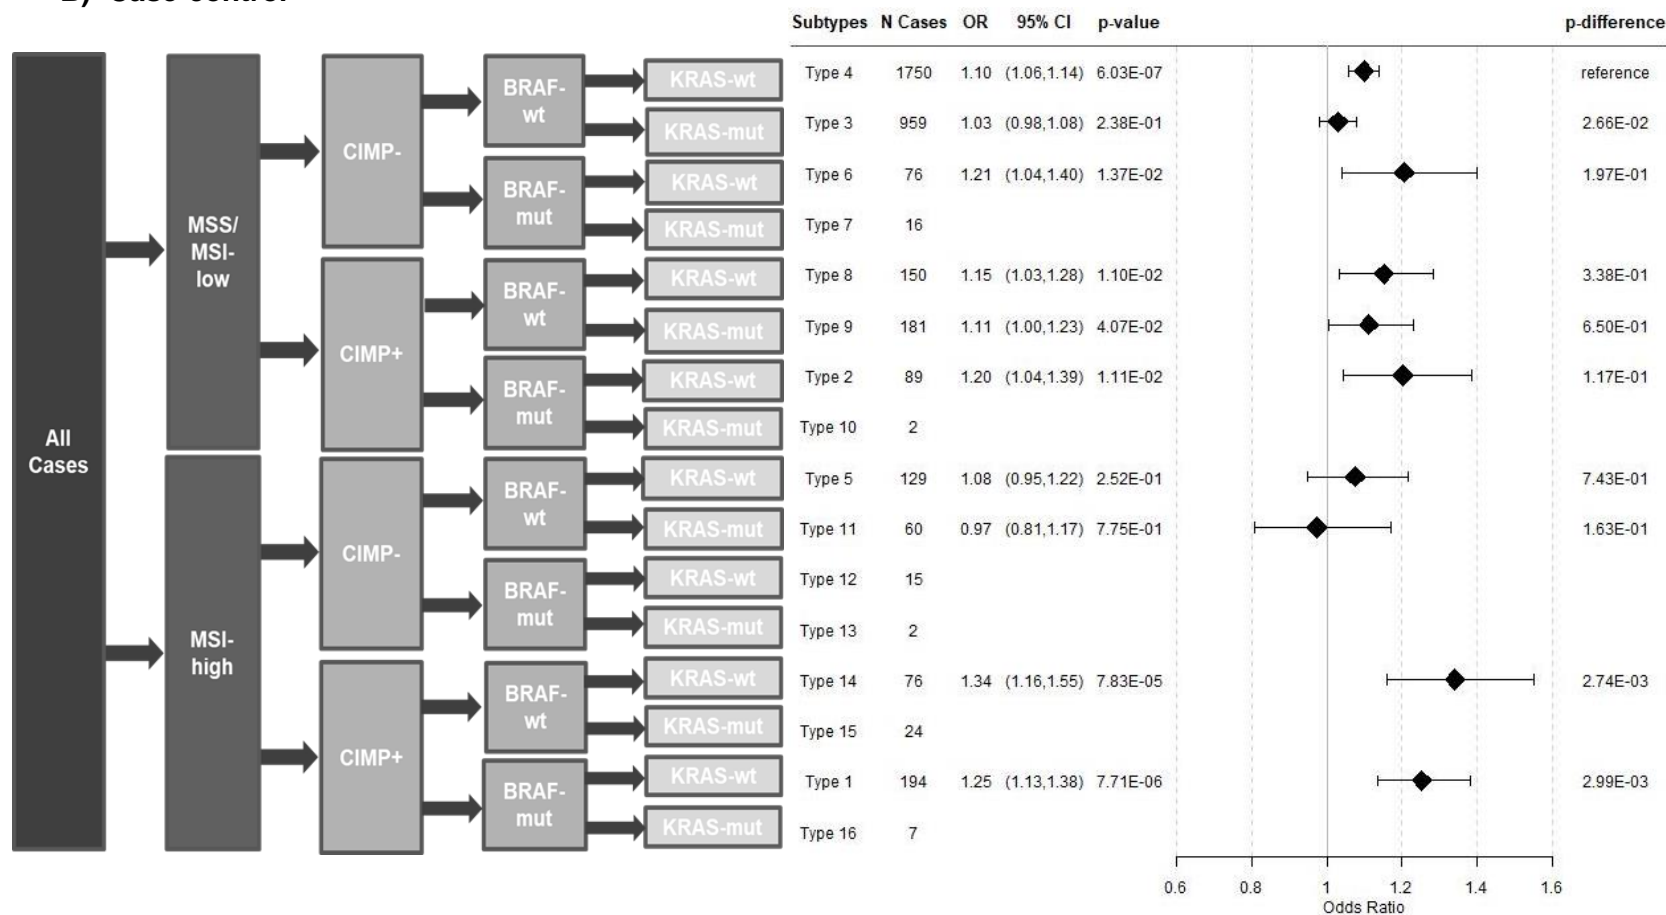

MSS: microsatellite stable; MSI: microsatellite instability; CIMP: CpG island methylation phenotype; wt: wild type; mut: mutated; OR: odds ratio; 95% CI: 95% confidence interval; Two-sided Wald test was used to calculate the P values from the case-control analysis (N controls = 3,184 for cohort and N controls = 8,478 for case-control) and case-only analysis (Pdifference). A Bonferroni corrected p-value threshold of  $5.0 \times 10^{-3}$  was used for both case-control and case-only analyses.
